# Supplementary material for: Fighting Together: Agency vs. Wholesale Distribution Contracts for Digital Content Supply Chains in the Presence of Piracy
Source: Atypon-hosted journal article supplement (doi:10.1287/msom.2024.1186), 2025-10-15
Supplement: msom.2024.1186.sm1.pdf [file msom.2024.1186.sm1.pdf]

# E-Companion to “Fighting Together: Agency vs. Wholesale Distribution Contracts for Digital Content Supply Chains in the Presence of Piracy”

## EC.1. Tables

**Table EC.1** Equilibrium under  $HH: \theta = 1, r = 1$ 

| Variables     | $V$ (VI Firm) | $W$ (Wholesale) | $A$ (Agency)       |
|---------------|---------------|-----------------|--------------------|
| $w^{HH*}$     | —             | $\frac{1}{2}$   | —                  |
| $p^{HH*}$     | $\frac{1}{2}$ | $\frac{3}{4}$   | $\frac{1}{2}$      |
| $\pi_V^{HH*}$ | $\frac{1}{4}$ | —               | —                  |
| $\pi_M^{HH*}$ | —             | $\frac{1}{8}$   | $\frac{1-\phi}{4}$ |
| $\pi_P^{HH*}$ | —             | $\frac{1}{16}$  | $\frac{\phi}{4}$   |
| $\pi_T^{HH*}$ | $\frac{1}{4}$ | $\frac{3}{16}$  | $\frac{1}{4}$      |
| $CS^{HH*}$    | $\frac{1}{8}$ | $\frac{1}{32}$  | $\frac{1}{8}$      |

**Table EC.2** Equilibrium under  $HL: \theta = 1, r \leq 1$ 

| Variables     | $V$ (VI Firm)                     | $W$ (Wholesale)                       | $A$ (Agency)                                  |
|---------------|-----------------------------------|---------------------------------------|-----------------------------------------------|
| $r^{HL*}$     | $\frac{\beta}{4}$                 | $\frac{\beta}{16}$                    | $\frac{\beta\phi}{4}$                         |
| $w^{HL*}$     | —                                 | $\frac{16(1-\beta)+\beta^2}{32}$      | —                                             |
| $p^{HL*}$     | $\frac{(2-\beta)^2}{8}$           | $\frac{3(16(1-\beta)+\beta^2)}{64}$   | $\frac{4(1-\beta)+\beta^2\phi}{8}$            |
| $\pi_V^{HL*}$ | $\frac{8(1-\beta)+\beta^2}{32}$   | —                                     | —                                             |
| $\pi_M^{HL*}$ | —                                 | $\frac{16(1-\beta)+\beta^2}{128}$     | $\frac{(1-\phi)(4(1-\beta)+\beta^2\phi)}{16}$ |
| $\pi_P^{HL*}$ | —                                 | $\frac{32(1-\beta)+\beta^2}{512}$     | $\frac{\phi(8(1-\beta)+\beta^2\phi)}{32}$     |
| $\pi_T^{HL*}$ | $\frac{8(1-\beta)+\beta^2}{32}$   | $\frac{96(1-\beta)+5\beta^2}{512}$    | $\frac{8(1-\beta)+\beta^2(2-\phi)\phi}{32}$   |
| $CS^{HL*}$    | $\frac{4(1+3\beta)-3\beta^2}{32}$ | $\frac{16(1+15\beta)-15\beta^2}{512}$ | $\frac{4(1+3\beta)-3\beta^2\phi}{32}$         |

**Table EC.3** Thresholds on the Cost of Quality Improvement  $c$ 

| Threshold       | Definition                                                                                                                                                                                                           |
|-----------------|----------------------------------------------------------------------------------------------------------------------------------------------------------------------------------------------------------------------|
| $c_V$           | $\frac{(2-\beta)^2}{16}$                                                                                                                                                                                             |
| $c_W$           | $\frac{8(1-\beta)+\beta^2}{64}$                                                                                                                                                                                      |
| $c_A$           | $\frac{(1-\phi)(2(1-\beta)+\phi\beta^2)}{8}$                                                                                                                                                                         |
| $c_A^\theta$    | $\frac{\beta^2(1-\phi)^2}{8}$                                                                                                                                                                                        |
| $c_A^M$         | $\frac{\beta^2(1-\phi)}{16}$                                                                                                                                                                                         |
| $c_A^{CS}$      | $\frac{1}{72} - \frac{4+3\beta(4+3\beta(1-\phi)(1-9\phi-9\beta(1-\phi)))}{288(1+3\beta)} + \frac{\beta^2(1-\phi)\sqrt{1+9\beta^2(1-\phi)(9-17\phi)-18\beta(1-\phi)^2-\phi(58-121\phi)}}{32(1+3\beta)}$               |
| $c_{AW}^\theta$ | $\frac{\beta^2(1-\phi)(1-4\phi)}{32(1-2\phi)}$                                                                                                                                                                       |
| $c_{AW}^r$      | $\frac{2(1-\beta)+\phi\beta^2}{64\phi}$                                                                                                                                                                              |
| $\bar{c}_\pi$   | $\frac{\beta^2(1-\phi)(1-3\phi)}{48-64(2-\phi)\phi}$                                                                                                                                                                 |
| $c_\pi$         | $\frac{16(1-\beta)+\beta^2(1+8(1-\phi)\phi)+\sqrt{(16(1-\beta)(2\phi-1)+\beta^2(1-8(1-\phi)\phi))(16(3-2\phi)(1-\beta)+\beta^2(1-8(1-\phi)\phi))}}{128}$                                                             |
| $c_{AW}^{CS}$   | $\frac{8(1-\phi)}{5} + \frac{\beta^2(1-\phi)\phi}{8} - \frac{8(11+230\beta)(1-\phi)}{80+75(16-\beta)\beta} + \frac{(1-\beta)(1-\phi)\sqrt{3(15(\beta-16)\beta-16)\beta^2\phi+64(1+3\beta)^2}}{16+15(16-\beta)\beta}$ |

## EC.2. Detailed Analysis

Here, we provide a detailed analysis of our model. We begin with the general model, that is, scenario  $LL$ , followed by the baseline scenario with zero piracy, that is, Scenario  $LH$ , which is a special case of the general model. Then we analyze the two other special cases, Scenario  $HH$ , and Scenario  $HL$ , which are the *highest-quality* special cases of Scenario  $LH$  and  $LL$ , respectively. The analyses of the three special cases follow a logic similar to the general model, so we provide the most detailed analysis for Scenario  $LL$ .

### EC.2.1. Analysis of the Base Model : $\theta \leq 1$ and $r \leq 1$ (Scenario $LL$ )

Decisions in stages 1 and 2 are given as  $\theta \leq 1$  and  $r \leq 1$ , while  $c > 0$  and  $k > 0$ . In stage 4, the consumer with valuation  $v$  faces quality  $\theta \leq 1$  and enforcement level  $r \leq 1$ . By purchasing genuine content at price  $p$ , the consumer will receive the utility given by (1),  $\mathcal{U}(v, \theta, p) = v\theta - p$ . However, by obtaining pirated content at zero price, the consumer will receive the utility given by (2),  $\mathcal{U}_P(v, \theta, r) = (1-r)v\beta\theta$ .

**ASSUMPTION EC.1.** *Tie-breaking rules: A consumer is indifferent between: (a) purchasing the genuine product and consuming the pirated product (that is,  $\mathcal{U} = \mathcal{U}_P$ ), purchases the genuine product; (b) consuming the pirated product and doing nothing (that is,  $\mathcal{U}_P = 0$ ), does nothing.*

Thus, the demand for the genuine product, given by (3a), becomes  $\mathcal{D}(\theta, r, p) = 1 - \frac{p}{\theta} \cdot \frac{1}{1-\beta(1-r)}$ , and following (3b), the demand for the pirated product is  $\mathcal{D}_P(\theta, r, p) = \frac{p}{\theta} \cdot \frac{1}{1-\beta(1-r)}$  as long as  $r < 1$ , and zero otherwise.

**Table EC.4** Thresholds on the Commission Rate  $\phi$  and the Relative Quality of the Pirated Content  $\beta$ 

| Threshold                | Definition                                                                                                                                                                                                                                                                                           |
|--------------------------|------------------------------------------------------------------------------------------------------------------------------------------------------------------------------------------------------------------------------------------------------------------------------------------------------|
| $\hat{\phi}$             | $\frac{(2+\beta)\beta-2-\sqrt{4-\beta(8-\beta(8-32c-(4-\beta)\beta))}}{2\beta^2}$                                                                                                                                                                                                                    |
| $\bar{\phi}$             | $\frac{(2+\beta)\beta-2+\sqrt{4-\beta(8-\beta(8-32c-(4-\beta)\beta))}}{2\beta^2}$                                                                                                                                                                                                                    |
| $\hat{\phi}_\theta$      | $1 - \frac{2\sqrt{2c}}{\beta}$                                                                                                                                                                                                                                                                       |
| $\hat{\phi}_{M_1}$       | $\frac{1}{2} - \frac{2(1-\beta)}{\beta^2}$                                                                                                                                                                                                                                                           |
| $\hat{\phi}_{M_2}$       | $1 - \frac{16c}{\beta^2}$                                                                                                                                                                                                                                                                            |
| $\hat{\phi}_{CS}$        | is the (real) solution to $\frac{\partial CS_A^*(c > c_A)}{\partial \phi} = 0$                                                                                                                                                                                                                       |
| $\hat{\phi}_\theta^{AW}$ | $\frac{(5\beta^2 - 64c) - \sqrt{9\beta^4 + 4096c^2 - 128\beta^2c}}{8\beta^2}$                                                                                                                                                                                                                        |
| $\hat{\phi}_r^{AW}$      | $\frac{2(1-\beta)}{64c - \beta^2}$                                                                                                                                                                                                                                                                   |
| $\hat{\phi}_{M_1}^{AW}$  | $\frac{2\beta(4+\beta) - 8 - \sqrt{2\beta(\beta^3 + 32\beta - 64) + 64}}{4\beta^2}$                                                                                                                                                                                                                  |
| $\hat{\phi}_{M_2}^{AW}$  | $\frac{A - \sqrt{B}}{2\beta(\beta((\beta-16)\beta - 64c - 16) + 64) - 64}$ , where $A = (128 - (48 + (16 - \beta)\beta + 64c)\beta) - 64$ , and $B = (16 - 64c - 16\beta + \beta^2)(1024c - 2048c\beta + 512c\beta^2 + 2048c^2\beta^2 + 512c\beta^3 + 16\beta^4 - 96c\beta^4 - 16\beta^5 + \beta^6)$ |
| $\hat{\phi}_{M_3}^{AW}$  | $\frac{2(32c - \beta^2) + \sqrt{1024c^2 - 48c\beta^2 + \beta^4}}{64c - 3\beta^2}$                                                                                                                                                                                                                    |
| $\beta_c$                | $\frac{4(1-2\phi) + 2\sqrt{2(1-2\phi)(3-4\phi(3-2\phi))}}{8\phi(1-\phi) - 1}$                                                                                                                                                                                                                        |
| $\beta_M$                | $4 \left( \frac{2-4\phi + \sqrt{5-2\phi(13-4\phi(5-2\phi))}}{8(1-\phi)\phi - 1} \right)$                                                                                                                                                                                                             |
| $\beta_\pi$              | $\frac{4(3-8\phi+4\phi^2) + 2\sqrt{2(3-2\phi)(1-2\phi)(7-8\phi(3-2\phi))}}{8\phi(1-\phi) - 1}$                                                                                                                                                                                                       |

**EC.2.1.1. Wholesale Contract With  $\theta \leq 1$  and  $r \leq 1$  ( $W_{LL}$ )** Given  $\theta \leq 1$  and  $r \leq 1$ , while  $c > 0$  and  $k > 0$ , the profit functions for  $M$  and  $P$  are:

$$\pi_{MW}(\theta, r, w, p) = w \left( 1 - \frac{p}{\theta} \cdot \frac{1}{1 - \beta(1-r)} \right) - \frac{1}{2}c\theta^2, \quad \text{and} \quad (\text{EC.1})$$

$$\pi_{PW}(\theta, r, w, p) = (p - w) \left( 1 - \frac{p}{\theta} \cdot \frac{1}{1 - \beta(1-r)} \right) - \frac{1}{2}r^2. \quad (\text{EC.2})$$

Recall the sequence of events discussed in Figure 1(a). In stage 3(b), in response to  $M$ 's wholesale price  $w$  and content quality  $\theta$ , and its own decision on the protection level  $r$ ,  $P$  chooses  $p(w, \theta, r) \geq 0$  to maximize  $\pi_{PW}(\theta, r, w, p)$ , given by (EC.2), which is concave in  $p$  as  $\frac{\partial^2 \pi_{PW}(\theta, r, w, p)}{\partial p^2} = -\frac{2}{\theta(1-\beta(1-r))} < 0$  for any  $0 < \beta < 1$ ,  $0 \leq r \leq 1$ , and  $0 \leq \theta \leq 1$ .

Applying first-order conditions (FOC) to (EC.2) with respect to  $p$  yields  $P$ 's selling price, given by  $p_W(w, \theta, r) = \frac{\theta + w - \beta\theta(1-r)}{2}$ . Since  $\theta, w \geq 0$ , and  $0 \leq \beta, r \leq 1$ , note that  $p_W(w, \theta, r) \geq 0$ . We obtain  $P$ 's demand and profit functions at this selling price, given by,  $D_W(w, \theta, r) = \frac{\theta - \beta\theta(1-r) - w}{2\theta(1-\beta(1-r))}$ , and  $\pi_{PW}(w, \theta, r) = \frac{(\theta - w - \beta\theta(1-r))^2}{4\theta(1-\beta(1-r))} - \frac{1}{2}r^2$ , respectively.

After substituting  $p_W(w, \theta, r)$  in (EC.1),  $M$ 's profit-maximization problem in stage 3(a) becomes:

$$\text{Maximize}_{w \geq 0} \pi_{MW}(\theta, r, w, p_W(\theta, r, w)) = w D_W(\theta, r, w) - \frac{1}{2}c\theta^2 = w \left( \frac{\theta - \beta\theta(1-r) - w}{2\theta(1-\beta(1-r))} \right) - \frac{1}{2}c\theta^2, \quad (\text{EC.3})$$

which is concave in  $w$ , as  $\frac{\partial^2 \pi_{MW}(\theta, r, w, p_W(\theta, r, w))}{\partial w^2} = -\frac{1}{\theta(1-\beta(1-r))} < 0$  for any  $0 < \beta < 1$ ,  $0 \leq r \leq 1$ , and  $0 \leq \theta \leq 1$ .

Applying FOC to EC.3 yields  $M$ 's wholesale price, and subsequently, its profit function, given by  $w_W(\theta, r) = \frac{\theta - \beta\theta(1-r)}{2}$  and  $\pi_{MW}^*(\theta, r) = \frac{\theta - \beta\theta(1-r)}{8} - \frac{1}{2}c\theta^2$ , respectively, in response to  $P$ 's protection level decision  $r$  and its own content quality decision  $\theta$ . Since  $\theta \geq 0$ , and  $0 \leq \beta, r \leq 1$ , note that  $w_W(\theta, r) \geq 0$ . Substituting  $w_W(\theta, r)$  in  $P$ 's response functions, we obtain  $P$ 's selling price and demand functions, given by  $p_W(\theta, r) = \frac{3\theta(1-\beta(1-r))}{4}$  and  $D_W(\theta, r) = \frac{1}{4}$ , respectively.

Substituting  $w_W(\theta, r)$  and  $p_W(\theta, r)$  in (EC.2),  $P$ 's profit-maximization problem in stage 2 becomes:

$$\text{Maximize}_{0 \leq r \leq 1} \pi_{PW}(\theta, r, w_W(\theta, r), p_W(\theta, r)) = \frac{\theta - \beta\theta(1-r)}{16} - \frac{r^2}{2}, \quad (\text{EC.4})$$

which is concave in  $r$ , as  $\frac{\partial^2 \pi_{PW}(\theta, r, w_W(\theta, r), p_W(\theta, r))}{\partial r^2} = -1 < 0$ .

Applying FOC on EC.4 yields  $P$ 's protection level, which in turn leads us to the selling price and profit in response to  $M$ 's choice of  $\theta$ , given by  $r_W(\theta) = \frac{\beta\theta}{16}$ ,  $p_W(\theta) = \frac{48\theta(1-\beta) + 3\beta^2\theta^2}{64}$ , and  $\pi_{PW}(\theta) = \frac{32\theta(1-\beta) + \beta^2\theta^2}{512}$ . Since  $\theta \geq 0$ , and  $0 \leq \beta \leq 1$ , note that all of these values are non-negative.

Anticipating  $P$ 's reaction, and substituting  $r_W(\theta)$ ,  $w_W(\theta)$ , and  $p_W(\theta)$  in (EC.1),  $M$ 's profit-maximization problem in stage 1 becomes:

$$\text{Maximize}_{0 \leq \theta \leq 1} \pi_{MW}(\theta, r_W(\theta), w_W(\theta), p_W(\theta)) = \frac{16\theta(1-\beta) + \beta^2\theta^2}{128} - \frac{1}{2}c\theta^2. \quad (\text{EC.5})$$

Applying FOC to (EC.5) with respect to  $\theta$  yields  $M$ 's content quality decision in stage 1, given by  $\theta_W^* = \frac{8(1-\beta)}{64c-\beta^2}$ , which in turn leads us to  $M$ 's wholesale price and profit in equilibrium, given by  $w_W^* = \frac{2(1-\beta)^2(128c-\beta^2)}{(64c-\beta^2)^2}$ , and  $\pi_{MW}^* = \frac{(1-\beta)^2}{128c-2\beta^2}$ , respectively.

Note that for this solution to be valid in equilibrium, we need  $c > c_W = \frac{8(1-\beta)+\beta^2}{64}$ . If this condition holds, we note that  $\pi_{MW}(\theta, r_W(\theta), w_W(\theta), p_W(\theta))$  is concave in  $\theta$  as  $\frac{\partial^2 \pi_{MW}(\theta, r_W(\theta), w_W(\theta), p_W(\theta))}{\partial \theta^2} = -c + \frac{\beta^2}{64} < 0$  for any  $c > \frac{8(1-\beta)+\beta^2}{64}$  and  $0 < \beta < 1$ .

Substituting  $w_W^*$  and  $\theta_W^*$  in  $P$ 's response functions, we obtain  $P$ 's selling price, protection level, and profit in equilibrium, given by  $p_W^* = \frac{3(1-\beta)^2(128c-\beta^2)}{(64c-\beta^2)^2}$ ,  $r_W^* = \frac{\beta(1-\beta)}{2(64c-\beta^2)}$ , and  $\pi_{PW}^* = \frac{(1-\beta)^2(256c-3\beta^2)}{8(64c-\beta^2)^2}$ , respectively. The channel profit is given by  $\pi_{TW}^* = \pi_{MW}^* + \pi_{PW}^* = \frac{(1-\beta)^2(512c-7\beta^2)}{8(64c-\beta^2)^2}$ . The consumer surplus is given by

$$CS_W^* = \int_0^{\bar{v}_W^*} \mathcal{U}_P(v, \theta, p) dv + \int_{\bar{v}_W^*}^1 \mathcal{U}(v, \theta, p_V^*) dv$$

$$= \int_0^{\frac{3}{4}} \left(1 - \frac{\beta(1-\beta)}{2(64c-\beta^2)}\right) v \beta \theta dv + \int_{\frac{3}{4}}^1 \left(v \frac{8(1-\beta)}{64c-\beta^2} - \frac{3(1-\beta)^2(128c-\beta^2)}{(64c-\beta^2)^2}\right) dv = \frac{(1-\beta)(128(1+15\beta)c - (17+15\beta)\beta^2)}{8(64c-\beta^2)^2}.$$

When  $c \leq c_W = \frac{8(1-\beta)+\beta^2}{64}$ ,  $M$ 's content quality is at the boundary, given by  $\theta_W^* = 1$ . Substituting  $\theta_W^* = 1$ , we obtain  $M$ 's wholesale price and profit in equilibrium if, given by  $w_W^* = \frac{16(1-\beta)+\beta^2}{32}$ , and  $\pi_{MW}^* = \frac{16(1-\beta)+\beta^2-64c}{128}$ , respectively. Similarly,  $P$ 's selling price, protection level, and firm profit in equilibrium are given by  $p_W^* = \frac{48(1-\beta)+3\beta^2}{64}$ ,  $r_W^* = \frac{\beta}{16}$ , and  $\pi_{PW}^* = \frac{32(1-\beta)+\beta^2}{512}$ , respectively. The channel profit and the consumer surplus are given by  $\pi_{TW}^* = \frac{96(1-\beta)+5\beta^2-256c}{512}$  and  $CS_W^* = \frac{16(1+15\beta)-15\beta^2}{512}$ , respectively. We summarize the results in Table 4 in column “ $W$  (Wholesale)” with the subscript  $W$  omitted.

**EC.2.1.2. Agency Contract With  $\theta \leq 1$  and  $r \leq 1$  ( $A_{LL}$ )** Given  $\theta \leq 1$  and  $r \leq 1$ , while  $c > 0$  and  $k > 0$ , the profit functions for  $M$  and  $P$  are:

$$\pi_{MA}(\theta, r, \phi, p) = (1-\phi)p \left(1 - \frac{p}{\theta} \cdot \frac{1}{1-\beta(1-r)}\right) - \frac{1}{2}c\theta^2, \quad \text{and} \quad (\text{EC.6})$$

$$\pi_{PA}(\theta, r, \phi, p) = \phi p \left(1 - \frac{p}{\theta} \cdot \frac{1}{1-\beta(1-r)}\right) - \frac{1}{2}r^2, \quad (\text{EC.7})$$

Recall the sequence of events discussed in Figure 1(b). In stage 3, in response to its content quality  $\theta$  and  $P$ 's protection level  $r$ ,  $M$  chooses  $p_A(\theta, r)$  that maximizes  $\pi_{MA}(\theta, r, \phi, p)$  given by (EC.6), which is concave in  $p$ , as  $\frac{\partial^2 \pi_{PA}(\theta, r, \phi, p)}{\partial p^2} = -\frac{2(1-\phi)}{\theta(1-\beta(1-r))} < 0$  for any  $0 < \beta < 1$ ,  $0 < \theta < 1$ ,  $0 \leq r \leq 1$ , and  $0 < \phi \leq \frac{1}{2}$ .

Applying FOC to (EC.6) with respect to  $p$  yields  $M$ 's selling price, and subsequently the market demand and profit function, given by  $p_A(\theta, r) = \frac{\theta-\beta\theta(1-r)}{2}$ ,  $\mathcal{D}_A(\theta, r) = \frac{1}{2}$ , and  $\pi_{MA}(\theta, r, \phi) = \frac{\theta(1-\phi)(1-\beta(1-r))}{4} - \frac{1}{2}c\theta^2$ , respectively. Since  $\theta \geq 0$ ,  $0 \leq \beta, r \leq 1$ , and  $0 < \phi \leq \frac{1}{2}$ , note that  $p_A(\theta, r) \geq 0$ . Substituting  $p_A(\theta, r)$  in (EC.7),  $P$ 's profit-maximization problem in stage 2 becomes:

$$\text{Maximize } \pi_{PA}(\theta, r, \phi, p_A(\theta, r)) = \frac{\phi\theta(1-\beta(1-r))}{4} - \frac{r^2}{2}, \quad (\text{EC.8})$$

$$0 \leq r \leq 1$$

which is concave in  $r$  as  $\frac{\partial^2 \pi_{PA}(\theta, r, \phi, p_A(\theta, r))}{\partial r^2} = -1 < 0$ .

Applying FOC to EC.8 yields  $P$ 's protection level, and subsequently  $P$ 's profit, as functions of  $\theta$  decided by  $M$ , given by  $r_A(\theta) = \frac{\beta\theta\phi}{4}$  and  $\pi_{PA}(\theta) = \frac{\phi\theta(8(1-\beta)+\phi\theta\beta^2)}{32}$ , respectively. Substituting  $r_A(\theta)$  in  $p_A(\theta, r)$ , we obtain  $M$ 's retail price as a function of  $\theta$ , given by  $p_A(\theta) = \frac{4\theta(1-\beta)+\phi\theta^2\beta^2}{8}$ ,  $q_A(\theta) = \frac{1}{2}$ .

Anticipating  $P$ 's reaction, and substituting  $r_A(\theta)$  and  $p_A(\theta)$  in (EC.6),  $M$ 's profit-maximization problem in stage 1 becomes:

$$\text{Maximize } \pi_{MA}(\theta, r_A(\theta), \phi, p_A(\theta)) = \frac{\theta(1-\phi)(4(1-\beta) + \phi\theta\beta^2)}{16} - \frac{1}{2}c\theta^2. \quad (\text{EC.9})$$

$$0 \leq \theta \leq 1$$

Applying FOC to (EC.9) with respect to  $\theta$  yields  $M$ 's content quality, and subsequently, its selling price and profit in equilibrium, given by  $\theta_A^* = \frac{2(1-\beta)(1-\phi)}{8c-(1-\phi)\phi\beta^2}$ ,  $p_A^* = \frac{(1-\beta)^2(1-\phi)(16c-(1-\phi)\phi\beta^2)}{2(8c-(1-\phi)\phi\beta^2)}$ , and  $\pi_{MA}^* = \frac{(1-\beta)^2(1-\phi)^2}{4(8c-(1-\phi)\phi\beta^2)}$ , respectively.

Note that for this solution to be valid in equilibrium, we need  $c > c_A = \frac{(1-\phi)(2-(2-\beta\phi)\beta)}{8}$ . Then, we can show that this solution is optimal as  $\pi_{MA}(\theta, r_A(\theta), \phi, p_A(\theta))$  is concave in  $\theta$ , as  $\frac{\partial^2 \pi_{MA}(\theta, r_A(\theta), \phi, p_A(\theta))}{\partial \theta^2} = -c + \frac{\beta^2\phi(1-\phi)}{8} < 0$  for any  $c > \frac{(1-\phi)(2-(2-\beta\phi)\beta)}{8}$ ,  $0 < \beta < 1$ , and  $0 < \phi \leq \frac{1}{2}$ .

Substituting  $\theta_A^*$  in  $P$ 's response functions, we obtain  $P$ 's protection level and profit in equilibrium, given by  $r_A^* = \frac{\beta\phi(1-\beta)(1-\phi)}{2(8c-(1-\phi)\phi\beta^2)}$ , and  $\pi_{PA}^* = \frac{(1-\beta)^2(1-\phi)\phi(32c-3(1-\phi)\phi\beta^2)}{8(8c-(1-\phi)\phi\beta^2)}$ , respectively. The channel profit is given by  $\pi_{TA}^* = \pi_{MA}^* + \pi_{PA}^* = \frac{(1-\beta)^2(1-\phi)(16c(1+\phi)-(2-\phi-\phi^2)\phi\beta^2)}{8(8c-(1-\phi)\phi\beta^2)}$ . The consumer surplus is given by

$$CS_A^* = \int_0^{\bar{v}_A^*} \mathcal{U}_P(v, \theta, p) dv + \int_{\bar{v}_A^*}^1 \mathcal{U}(v, \theta, p_V^*) dv$$

$$\begin{aligned}
&= \int_0^{\frac{1}{2}} \left(1 - \frac{\beta\phi(1-\beta)(1-\phi)}{2(8c - (1-\phi)\phi\beta^2)}\right) v\beta\theta dv + \int_{\frac{1}{2}}^1 \left(v \frac{2(1-\beta)(1-\phi)}{8c - (1-\phi)\phi\beta^2} - \frac{(1-\beta)^2(1-\phi)(16c - (1-\phi)\phi\beta^2)}{2(8c - (1-\phi)\phi\beta^2)^2}\right) dv \\
&= \frac{(1-\beta)(1-\phi)(16c(1+3\beta) - (5+3\beta)(1-\phi)\phi\beta^2)}{8(8c - (1-\phi)\phi\beta^2)^2}.
\end{aligned}$$

When  $c \leq c_A = \frac{(1-\phi)(2-(2-\beta\phi)\beta)}{8}$ ,  $M$ 's content quality is at the boundary, given by  $\theta_A^* = 1$ . Substituting  $\theta_A^* = 1$ , we obtain  $M$ 's selling price, selling quantity, and profit in equilibrium, given by  $p_A^* = \frac{4(1-\beta)+\phi\beta^2}{8}$ ,  $q_A^* = \frac{1}{2}$ , and  $\pi_{MA}^* = \frac{(1-\phi)(4(1-\beta)+\phi\beta^2)-8c}{16}$ , respectively. Similarly,  $P$ 's protection level and firm profit in equilibrium are given by  $r_A^* = \frac{\beta\phi}{4}$ ,  $\pi_{PA}^* = \frac{\phi(8(1-\beta)+\phi\beta^2)}{32}$ , respectively. The channel profit and the consumer surplus are given by  $\pi_{TA}^* = \frac{8(1-\beta)+\phi(2-\phi)\beta^2-16c}{32}$  and  $CS_A^* = \frac{4(1+3\beta)-3\beta^2\phi}{32}$ , respectively. The results are summarized in Table 4 in column "A (Agency)" with the subscript A omitted.

**EC.2.1.3. Vertically Integrated Supply Chain With  $\theta \leq 1$  and  $r \leq 1$  ( $V_{LL}$ )** In this scenario, the demand for genuine content is as given by (3a). The profit-maximization problem for firm  $V$  then becomes:

$$\text{Maximize}_{p \geq 0, r \geq 0, \theta \geq 0} \pi_V(\theta, r, p) = p\mathcal{D}(\theta, r, p) - \frac{1}{2}c\theta^2 - \frac{1}{2}r^2 = p \left(1 - \frac{p}{\theta} \cdot \frac{1}{1-\beta(1-r)}\right) - \frac{1}{2}c\theta^2 - \frac{1}{2}r^2, \quad (\text{EC.10})$$

Applying first-order conditions (FOC) on (EC.10), we obtain firm  $V$ 's content quality, protection level, selling price, selling quantity, and profit in equilibrium, given by  $\theta_V^* = \frac{4(1-\beta)}{16c-\beta^2}$ ,  $r_V^* = \frac{\beta(1-\beta)}{16c-\beta^2}$ ,  $p_V^* = \frac{32c(1-\beta)^2}{(16c-\beta^2)^2}$ , and  $\pi_V^* = \frac{(1-\beta)^2}{32c-2\beta^2}$ , respectively. This equilibrium solution exists when  $c > c_V = \frac{(2-\beta)^2}{16}$ . Then, we can show that this solution is optimal as the Hessian  $\begin{pmatrix} -\frac{2}{\theta(1-\beta(1-r))} & \frac{2p}{\theta^2(1-\beta(1-r))} & \frac{2\beta\theta p}{\theta^2(1-\beta(1-r))^2} \\ \frac{2p}{\theta^2(1-\beta(1-r))} & -c - \frac{2p^2}{\theta^3(1-\beta(1-r))} & -\frac{\beta p^2}{\theta^2(1-\beta(1-r))^2} \\ \frac{2\beta\theta p}{\theta^2(1-\beta(1-r))^2} & -\frac{\beta p^2}{\theta^2(1-\beta(1-r))^2} & -\frac{2\beta^2\theta^2 p^2}{(\theta+\beta\theta(r-1))^3} - 1 \end{pmatrix}$  is negative definite at  $\theta_V^* = \frac{4(1-\beta)}{16c-\beta^2}$ ,  $r_V^* = \frac{\beta(1-\beta)}{16c-\beta^2}$ ,  $p_V^* = \frac{32c(1-\beta)^2}{(16c-\beta^2)^2}$ . The value of determinant of the Hessian (or the third-order principal minor) is  $-\frac{(16c-\beta^2)^3}{512c(1-\beta)^2} < 0$  for any  $0 < \beta < 1$  and  $c > \frac{(2-\beta)^2}{16}$ . Similarly, we can easily show that the determinant of all second-order principal minors is positive and that the first-order principal minors are negative. The channel profit is the same as firm  $V$ 's profit, given by  $\pi_{TV}^* = \frac{(1-\beta)^2}{32c-2\beta^2}$ , while the consumer surplus is given by

$$\begin{aligned}
CS_V^* &= \int_0^{\bar{v}_V^*} \mathcal{U}_P(v, \theta, p) dv + \int_{\bar{v}_V^*}^1 \mathcal{U}(v, \theta, p_V^*) dv \\
&= \int_0^{\frac{1}{2}} \left(1 - \frac{\beta(1-\beta)}{16c-\beta^2}\right) v\beta\theta dv + \frac{4(1-\beta)}{16c-\beta^2} \int_{\frac{1}{2}}^1 \left(v - \frac{8c(1-\beta)}{16c-\beta^2}\right) dv = \frac{2(1-\beta)(4c(1+3\beta) - \beta^2)}{(16c-\beta^2)^2}.
\end{aligned}$$

When  $c \leq c_V = \frac{(2-\beta)^2}{16}$ , firm  $V$ 's content quality is set at the boundary, i.e.,  $\theta_V^{LH*} = 1$ . Substituting  $\theta_V^* = 1$ , we obtain firm  $V$ 's protection level, selling price, selling quantity, firm profit, channel profit, and consumer surplus in equilibrium, given by  $r_V^* = \frac{\beta}{4}$ ,  $p_V^* = \frac{(2-\beta)^2}{8}$ ,  $\pi_V^{LH*} = \frac{8(1-\beta)+\beta^2}{32}$ ,  $\pi_{TV}^* = \frac{8(1-\beta)+\beta^2}{32}$ , and  $CS_V^* = \frac{4(1+3\beta)-3\beta^2}{32}$ , respectively. We summarize the results in Table 5, in column "V (VI Firm)," with the subscript V omitted.

## EC.2.2. Analysis of $\theta \leq 1$ and $r = 1$ ( $LH$ )

The decisions in stages 1 and 2 are given as  $r = 1$  and  $\theta \leq 1$ , while  $k = 0$  and  $c > 0$ . In stage 4, the consumer with valuation  $v$  faces enforcement level  $r = 1$  and quality  $\theta \leq 1$ . By buying the genuine content at price  $p$ , the consumer will receive the utility given by  $\mathcal{U}(v, \theta, p) = v\theta - p$  (see (1)). However, by obtaining the pirated content at zero price, the consumer will receive the utility given by substituting  $r = 1$  and  $\theta \leq 1$  in (2), which yields  $\mathcal{U}_P(v, \theta, 1) = 0$ . Thus, the demand for the genuine product, given by (3a), becomes  $\mathcal{D}(\theta, 1, p) = 1 - \frac{p}{\theta}$ . Since  $\mathcal{U}_P(v, \theta, 1) = 0$  for all  $v$ , following (3b), the demand for the pirated product is  $\mathcal{D}_P(\theta, 1, p) = 0$ . The analysis is quite similar to that in Section EC.2.1, so we provide the key steps.

**EC.2.2.1. Vertically Integrated Supply Chain With  $\theta \leq 1$  and  $r = 1$  ( $V_{LH}$ )** The profit-maximization problem in stage 3 for firm  $V$  is to maximize its profit given by (EC.11):

$$\text{Maximize}_{p \geq 0, 0 \leq \theta \leq 1} \pi_V(\theta, 1, p) = p\mathcal{D}(\theta, 1, p) - \frac{1}{2}c\theta^2 = p \left(1 - \frac{p}{\theta}\right) - \frac{1}{2}c\theta^2. \quad (\text{EC.11})$$

Note that  $\pi_V(\theta, 1, p)$  is jointly concave in  $p$  and  $\theta$  as the Hessian  $\begin{pmatrix} -\frac{2}{\theta} & \frac{2p}{\theta^2} \\ \frac{2p}{\theta^2} & -c - \frac{2p^2}{\theta^3} \end{pmatrix}$  is negative definite as the value of determinant is  $\frac{2c}{\theta} > 0$  for any  $c > 0$  and  $\theta > 0$  (the first-order principal minors are negative too). Applying FOC on (EC.11) yields firm  $V$ 's content quality and selling price, and hence the profit in equilibrium, given by  $\theta_V^{LH*} = \frac{1}{4c}$ ,  $p_V^{LH*} = \frac{1}{8c}$ , and  $\pi_V^{LH*} = \frac{1}{32c}$ , respectively. This equilibrium solution is valid when  $c > \frac{1}{4}$ . The channel profit is the same as firm  $V$ 's profit, given by  $\pi_{CV}^{LH*} = \frac{1}{32c}$ , while the consumer surplus is given by

$$CS_V^{LH*} = \int_0^{\bar{v}_V^{LH*}} \mathcal{U}_P(v, \theta, 1) dv + \int_{\bar{v}_V^{LH*}}^1 \mathcal{U}(v, \theta, p_V^{LH*}) dv = \int_0^{\frac{1}{2}} 0 dv + \frac{1}{4c} \int_{\frac{1}{2}}^1 \left(v - \frac{1}{2}\right) dv = \frac{v(v-1)}{8c} \Big|_{v=\frac{1}{2}}^{v=1} = \frac{1}{32c}.$$

When  $c \leq \frac{1}{4}$ , firm  $V$ 's content quality is set at the boundary, given by  $\theta_V^{LH*} = 1$ . Substituting  $\theta_V^{LH*} = 1$ , we obtain the firm  $V$ 's selling price, firm profit, channel profit, and consumer surplus in equilibrium, given by  $p_V^{LH*} = \frac{1}{2}$ ,  $\pi_V^{LH*} = \frac{1-2c}{4}$ ,  $\pi_T^{LH*} = \frac{1-2c}{4}$ , and  $CS_{CV}^{LH*} = \frac{1}{8}$ , respectively. The results are summarized in Table 6, in column "V (VI Firm)," with the subscript  $V$  omitted.

**EC.2.2.2. Wholesale Contract With  $\theta \leq 1$  and  $r = 1$  ( $W_{LH}$ )** Given  $\theta \leq 1$  and  $r = 1$ , while  $c > 0$  and  $k = 0$ , the profit functions for  $M$  and  $P$  are:

$$\pi_{MW}(\theta, 1, w, p) = w \left(1 - \frac{p}{\theta}\right) - \frac{1}{2}c\theta^2, \quad \text{and} \quad (\text{EC.12})$$

$$\pi_{PW}(\theta, 1, w, p) = (p - w) \left(1 - \frac{p}{\theta}\right). \quad (\text{EC.13})$$

In response to  $M$ 's wholesale price  $w$  and content quality  $\theta$ , firm  $P$  chooses  $p(w, \theta) \geq 0$  in stage 3(b) to maximize  $\pi_{PW}(\theta, 1, w, p)$ , given by (EC.13), which is concave in  $p$ , as  $\frac{\partial^2 \pi_{PW}(\theta, 1, w, p)}{\partial p^2} = -\frac{2}{\theta} < 0$  for any  $\theta > 0$ . Applying FOC to (EC.13) with respect to  $p$  yields  $P$ 's selling price, and hence demand and profit as functions of  $w$  and  $\theta$ , given by  $p_W^{LH}(w, \theta) = \frac{\theta+w}{2}$ ,  $\mathcal{D}_W^{LH}(w, \theta) = \frac{\theta-w}{2\theta}$ , and  $\pi_{PW}^{LH}(w, \theta) = \frac{(\theta-w)^2}{4\theta}$ , respectively. Because  $r = 1$ , there is no stage 2 decision. Therefore, anticipating  $P$ 's reaction,  $M$ 's stage 1 profit maximization problem becomes:

$$\text{Maximize } \pi_{MW}(\theta, 1, w, p_W^{LH}(w, \theta)) = w \mathcal{D}_W^{LH}(w, \theta) - \frac{1}{2}c\theta^2 = w \left(\frac{\theta-w}{2\theta}\right) - \frac{1}{2}c\theta^2, \quad (\text{EC.14})$$

which is obtained by substituting  $p_W^{LH}(w, \theta)$  in (EC.12). Now,  $\pi_{MW}(\theta, 1, w, p_W^{LH}(w, \theta))$  is jointly concave in  $w$  and  $\theta$  as the Hessian  $\begin{pmatrix} -\frac{1}{\theta} & \frac{w}{\theta^2} \\ \frac{w}{\theta^2} & -c - \frac{w^2}{\theta^3} \end{pmatrix}$  is negative definite as the value of determinant is  $\frac{c}{\theta} > 0$  for any  $c > 0$  and  $\theta > 0$  (the first-order principal minors are negative too). Applying FOC to (EC.12) with respect to  $w$  and  $\theta$  yields  $M$ 's wholesale price and content quality, and thus profit, given by  $w_W^{LH*} = \frac{1}{16c}$ ,  $\theta_W^{LH*} = \frac{1}{8c}$ , and  $\pi_{MW}^{LH*} = \frac{1}{128c}$ , respectively. This equilibrium solution exists when  $c > \frac{1}{8}$ . Substituting  $w_W^{LH*}$  and  $\theta_W^{LH*}$  in  $P$ 's response functions, we obtain  $P$ 's selling price and profit in equilibrium, given by  $p_W^{LH*} = \frac{3}{32c}$  and  $\pi_{PW}^{LH*} = \frac{1}{128c}$ , respectively. The channel profit is  $\pi_{TW}^{LH*} = \pi_{MW}^{LH*} + \pi_{PW}^{LH*} = \frac{1}{64c}$ , while the consumer surplus is:

$$CS_W^{LH*} = \int_0^{p_W^{LH*}} \frac{p_W^{LH*}}{\theta_W^{LH*}} \mathcal{U}_F(v, \theta, 1) dv + \int_{\frac{\theta_W^{LH*}}{p_W^{LH*}}}^1 \frac{p_W^{LH*}}{\theta_W^{LH*}} \mathcal{U}(v, \theta, p_W^{LH*}) dv = \int_0^{\frac{3}{32c}} 0 dv + \frac{1}{8c} \int_{\frac{3}{32c}}^1 \left(v - \frac{3}{4}\right) dv = \frac{v(2v-3)}{32c} \Big|_{v=\frac{3}{32c}}^{v=1} = \frac{1}{256c}.$$

When  $c \leq \frac{1}{8}$ ,  $M$ 's content quality  $\theta_W^{LH*} = 1$ . Substituting  $\theta_W^{LH*} = 1$ , we obtain  $M$ 's wholesale price and profit in equilibrium, given by  $w_W^{LH*} = \frac{1}{2}$  and  $\pi_{MW}^{LH*} = \frac{1-4c}{8}$ , respectively. Similarly,  $P$ 's selling price and profit, and consequently the channel profit and consumer surplus in equilibrium are given by  $p_W^{LH*} = \frac{3}{4}$ ,  $\pi_{PW}^{LH*} = \frac{1}{16}$ ,  $\pi_{TW}^{LH*} = \frac{3-8c}{16}$ , and  $CS_W^{LH*} = \frac{1}{32}$ , respectively. The results are summarized in Table 6, in column "W (Wholesale)," with the subscript  $W$  omitted.

**EC.2.2.3. Agency Contract With  $\theta \leq 1$  and  $r = 1$  ( $A_{LH}$ )** Given  $\theta \leq 1$  and  $r = 1$ , while  $c > 0$  and  $k = 0$ , the profit functions for  $M$  and  $P$  are:

$$\pi_{MA}(\theta, 1, \phi, p) = (1 - \phi) p \left(1 - \frac{p}{\theta}\right) - \frac{1}{2}c\theta^2, \quad \text{and} \quad (\text{EC.15})$$

$$\pi_{PA}(\theta, 1, \phi, p) = \phi p \left(1 - \frac{p}{\theta}\right), \quad (\text{EC.16})$$

Given the value of  $\phi$  and knowing that  $r = 1$ ,  $M$  chooses  $p \geq 0$  and  $0 < \theta \leq 1$  to maximize  $\pi_{MA}(\theta, 1, \phi, p)$  given by (EC.15). Now,  $\pi_{MA}(\theta, 1, \phi, p)$  is jointly concave in  $p$  and  $\theta$  as the Hessian  $\begin{pmatrix} -\frac{2(1-\phi)}{\theta} & \frac{2(1-\phi)p}{\theta^2} \\ \frac{2(1-\phi)p}{\theta^2} & -\frac{2(1-\phi)p^2}{\theta^3} - c \end{pmatrix}$  is negative definite

as the value of determinant is  $\frac{2c(1-\phi)}{\theta} > 0$  for any  $c, \theta > 0$ , and  $0 < \phi \leq \frac{1}{2}$  (the first-order principal minors are negative too).

Applying FOC to (EC.15) with respect to  $p$  and  $\theta$  yields  $M$ 's selling price, content quality, and profit in equilibrium, given by  $p_A^{LH*} = \frac{1-\phi}{8c}$ ,  $\theta_A^{LH*} = \frac{1-\phi}{4c}$ , and  $\pi_{MA}^{LH*} = \frac{(1-\phi)^2}{32c}$ , respectively. This equilibrium solution is valid when  $c > \frac{1-\phi}{4}$ . Substituting  $p_A^{LH*}$  and  $\theta_A^{LH*}$  in (EC.16), we obtain  $P$ 's profit in equilibrium, given by  $\pi_{PA}^{LH*} = \frac{(1-\phi)\phi}{16c}$ . The channel profit is  $\pi_{TA}^{LH*} = \pi_{MA}^{LH*} + \pi_{PA}^{LH*} = \frac{1-\phi^2}{32c}$ , while the consumer surplus is given by

$$CS_A^{LH*} = \int_0^{p_A^{LH*}} \frac{p_A^{LH*}}{\theta_A^{LH*}} \mathcal{U}_F(v, \theta, 1) dv + \int_{\frac{\theta_A^{LH*}}{p_A^{LH*}}}^1 \frac{p_A^{LH*}}{\theta_A^{LH*}} \mathcal{U}(v, \theta, p_A^{LH*}) dv = \int_0^{\frac{1-\phi}{8c}} 0 dv + \frac{1-\phi}{4c} \int_{\frac{1-\phi}{8c}}^1 \left(v - \frac{1}{2}\right) dv = \frac{(1-\phi)v(v-1)}{8c} \Big|_{v=\frac{1-\phi}{8c}}^{v=1} = \frac{1-\phi}{32c}.$$

When  $c \leq \frac{1-\phi}{4}$ ,  $M$ 's content quality  $\theta_A^{LH*} = 1$ . Substituting  $\theta_A^{LH*} = 1$ , we obtain  $M$ 's selling price and profit in equilibrium, given by  $p_A^{LH*} = \frac{1}{2}$  and  $\pi_{MA}^{LH*} = \frac{1-\phi-2c}{4}$ , respectively. Consequently,  $P$ 's profit, channel profit, and consumer surplus in equilibrium are given by  $\pi_{PA}^{LH*} = \frac{\phi}{4}$ ,  $\pi_{TA}^{LH*} = \frac{1-2c}{4}$ , and  $CS_A^{LH*} = \frac{1}{8}$ , respectively. The results are summarized in Table 6, under column "A (Agency)," with the subscript  $A$  omitted.

### EC.2.3. Analysis of $\theta = 1$ and $r = 1$ ( $HH$ )

The decisions in stages 1 and 2 are given as  $\theta = 1$  and  $r = 1$ , while  $c = 0$  and  $k = 0$ . In stage 4, the consumer with valuation  $v$  faces quality  $\theta = 1$  and enforcement level  $r = 1$ . By buying the genuine content at price  $p$ , the consumer will receive the

utility given by substituting  $\theta = 1$  in (1), which yields  $\mathcal{U}(v, 1, p) = v - p$ . However, by obtaining the pirated content at zero price, the consumer will receive the utility given by substituting  $\theta = 1$  and  $r = 1$  in (2), which yields  $\mathcal{U}_P(v, 1, 1) = 0$ . Thus, the demand for the genuine product, given by (3a), becomes  $\mathcal{D}(1, 1, p) = 1 - p$ . Since  $\mathcal{U}_P(v, 1, 1) = 0$  for all  $v$ , following (3b), the demand for the pirated product is  $\mathcal{D}_P(1, 1, p) = 0$ . The analysis is very similar to, and is a further special case of, Scenario *LH* with  $\theta = 1$  (see Section EC.2.2). For the sake of brevity, we omit repeating the detailed steps. The results are summarized in Table EC.1.

#### EC.2.4. Analysis of $\theta = 1$ and $r \leq 1$ (*HL*)

The decisions in stages 1 and 2 are given as  $\theta = 1$  and  $r \leq 1$ , while  $c = 0$  and  $k > 0$ . In stage 4, the consumer with valuation  $v$  faces quality  $\theta = 1$  and enforcement level  $r \leq 1$ . By buying the genuine content at price  $p$ , the consumer will receive the utility given by substituting  $\theta = 1$  in (1), which yields  $\mathcal{U}(v, 1, p) = v - p$ . However, by obtaining the pirated content at zero price, the consumer will receive the utility given by substituting  $\theta = 1$  and  $r \leq 1$  in (2), which yields  $\mathcal{U}_P(v, 1, r) = (1 - r)v\beta$ . Thus, the demand for the genuine product, given by (3a), becomes  $\mathcal{D}(1, r, p) = 1 - \frac{p}{1 - \beta(1 - r)}$ , and following (3b), the demand for the pirated product is  $\mathcal{D}_P(1, r, p) = \frac{p}{1 - \beta(1 - r)}$  as long as  $r < 1$ , and zero otherwise. The analysis is very similar to, and is a special case of, Scenario *LL* with  $\theta = 1$  (see Section EC.2.1). For the sake of brevity, we omit repeating the detailed steps. The results are summarized in Table EC.2.

### EC.3. Proofs of Key Results

We now provide the proofs of the lemmas and propositions in Section 4.

#### EC.3.1. Proof of Proposition 1

From Table 4, observe that for  $c \leq c_A = \frac{(1-\phi)(2(1-\beta)+\phi\beta^2)}{8}$ , the optimal quality,  $\theta_A^* = 1$ , and hence  $\frac{\partial\theta_A^*}{\partial\phi} = 0$ . However, when  $c > c_A$ ,  $\theta_A^* = \frac{2(1-\beta)(1-\phi)}{8c-\beta^2(1-\phi)\phi}$ , and thus  $\frac{\partial\theta_A^*}{\partial\phi} = -\frac{2(1-\beta)(8c-\beta^2(1-\phi)^2)}{(8c-\phi(1-\phi)\beta^2)^2}$ . Since  $1 - \beta > 0$  and  $8c - \phi(1 - \phi)\beta^2 > 0$  for any  $0 < \beta < 1$ ,  $0 < \phi \leq \frac{1}{2}$ , and  $c > c_A$ , therefore,  $\frac{\partial\theta_A^*}{\partial\phi} > 0$ , when  $8c - \beta^2(1 - \phi)^2 < 0$  and  $c > c_A$ , that is, when  $c \in (c_A, c_A^\theta)$ , where  $c_A^\theta = \frac{\beta^2(1-\phi)^2}{8}$ . Now,  $c_A^\theta - c_A = \frac{\beta^2(1-\phi)^2}{8} - \frac{(1-\phi)(2(1-\beta)+\phi\beta^2)}{8} = \frac{(1-\phi)(\beta^2-2(1-\beta)-2\phi\beta^2)}{8} > 0$  when  $\phi < \frac{1}{2} - \frac{1-\beta}{\beta^2}$  as  $1 - \phi > 0$ . Furthermore,  $\frac{1}{2} - \frac{1-\beta}{\beta^2} < \frac{1}{2}$  for any  $0 < \beta < 1$ . However,  $\frac{1}{2} - \frac{1-\beta}{\beta^2} > 0$  if  $\beta > \sqrt{3} - 1$ . This implies that  $c_A < c_A^\theta$  only if  $\beta > \sqrt{3} - 1$  and  $\phi < \frac{1}{2} - \frac{1-\beta}{\beta^2}$ . Hence,  $\frac{\partial\theta_A^*}{\partial\phi} > 0$  if and only if  $\beta > \sqrt{3} - 1$ ,  $\phi < \frac{1}{2} - \frac{1-\beta}{\beta^2}$ , and  $c \in (c_A, c_A^\theta)$ .

**Graphical Representation in Figure 2:** Analyzing  $c_A$ , we find that  $c \leq c_A$  only if  $\phi \leq \phi \leq \bar{\phi}$ . When  $c > c_A$ , then  $M$  sets  $\theta_A^* = \frac{2(1-\beta)(1-\phi)}{8c-\beta^2(1-\phi)\phi}$ , which is concave in  $\phi$  and is maximized at  $\phi = \hat{\phi}_\theta = 1 - \frac{2\sqrt{2c}}{\beta}$ . Analyzing  $\hat{\phi}_\theta$ , we observe that when  $c > c_A$ ,  $\theta_A^*$  increases in  $\phi$  only if  $c < c_A^\theta$ . Given that  $\theta_A^* = 1$  when  $c \leq c_A$  and  $\theta_A^*$  is decreasing in  $\phi$  when  $c > c_A^\theta$ , we deduce that  $\theta_A^*$  increases in  $\phi$  if and only if  $c \in (c_A, c_A^\theta)$ . For this condition to be feasible, we need  $c_A < c_A^\theta$ , which happens only if  $\beta > \sqrt{3} - 1$  and  $\phi < \frac{1}{2} - \frac{1-\beta}{\beta^2}$ .

#### EC.3.2. Proof of Proposition 2

From Table 4, observe that for  $c \leq c_A = \frac{(1-\phi)(2(1-\beta)+\phi\beta^2)}{8}$ , the manufacturer's profit,  $\pi_{MA}^* = \frac{(1-\phi)(4(1-\beta)+\beta^2\phi)-8c}{16}$ . We differentiate  $\pi_{MA}^*$  with respect to  $\phi$ , and note that  $\frac{\partial\pi_{MA}^*}{\partial\phi} = -\frac{4-\beta(4+\beta-2\beta\phi)}{16} > 0$  when  $0 < \phi < \frac{1}{2} - \frac{2(1-\beta)}{\beta^2}$ . Now,  $\frac{1}{2} - \frac{2(1-\beta)}{\beta^2} < \frac{1}{2}$  for any  $0 < \beta < 1$ . However,  $\frac{1}{2} - \frac{2(1-\beta)}{\beta^2} > 0$  if  $2(\sqrt{2}-1) < \beta < 1$ . This implies that  $\frac{\partial\pi_{MA}^*}{\partial\phi} > 0$  only if  $2(\sqrt{2}-1) < \beta < 1$ ,  $0 < \phi < \frac{1}{2} - \frac{2(1-\beta)}{\beta^2}$ , and  $0 < c < c_A$ . However, for  $c > c_A$ ,  $\pi_{MA}^* = \frac{(1-\beta)^2(1-\phi)^2}{4(8c-\beta^2(1-\phi)\phi)}$ . Differentiating  $\pi_{MA}^*$  with respect to  $\phi$ , we obtain  $\frac{\partial\pi_{MA}^*}{\partial\phi} = -\frac{(1-\beta)^2(1-\phi)(16c-\beta^2(1-\phi))}{4(8c-\beta^2(1-\phi)\phi)^2}$ . Since  $1 - \beta > 0$ ,  $1 - \phi > 0$ , and  $8c - \phi(1 - \phi)\beta^2 > 0$  for any  $0 < \beta < 1$ ,  $0 < \phi \leq \frac{1}{2}$ , and  $c > c_A$ , therefore,  $\frac{\partial\pi_{MA}^*}{\partial\phi} > 0$ , when  $16c - \beta^2(1 - \phi) < 0$ , that is,  $c < c_A^M = \frac{\beta^2(1-\phi)}{16}$ . Now,  $c_A^M - c_A = \frac{\beta^2(1-\phi)}{16} - \frac{(1-\phi)(2(1-\beta)+\phi\beta^2)}{8} = \frac{(1-\phi)(\beta^2-4(1-\beta)-2\phi\beta^2)}{16} > 0$  when  $\phi < \frac{1}{2} - \frac{2(1-\beta)}{\beta^2}$  as  $1 - \phi > 0$ . Furthermore,  $\frac{1}{2} - \frac{2(1-\beta)}{\beta^2} < \frac{1}{2}$  for any  $0 < \beta < 1$ . However,  $\frac{1}{2} - \frac{2(1-\beta)}{\beta^2} > 0$  if  $\beta > 2(\sqrt{2}-1)$ . This implies that  $c_A < c_A^M$  when  $\beta > 2(\sqrt{2}-1)$  and  $\phi < \frac{1}{2} - \frac{2(1-\beta)}{\beta^2}$ . Hence,  $\frac{\partial\pi_{MA}^*}{\partial\phi} > 0$  when  $\beta > 2(\sqrt{2}-1)$ ,  $\phi < \frac{1}{2} - \frac{2(1-\beta)}{\beta^2}$ , and  $c \in (c_A, c_A^M)$ . Taking a summary of these two scenarios, we conclude that  $\frac{\partial\pi_{MA}^*}{\partial\phi} > 0$ , when  $2(\sqrt{2}-1) < \beta < 1$  and  $0 < \phi < \frac{1}{2} - \frac{2(1-\beta)}{\beta^2}$ , and  $c < \max\{c_A, c_A^M\}$ .

**Graphical Representation in Figure 3:** Given that  $\phi \geq 0$ , for  $0 < \phi < \hat{\phi}_{M_1}$ , it is necessary that  $\hat{\phi}_{M_1} > 0$ , or  $\beta > 2(\sqrt{2}-1)$ , which can be verified by analyzing  $\hat{\phi}_{M_1}$ . Intuitively,  $M$  benefits from an increase in  $\phi$  when the relative quality of the pirated content  $\beta$  is sufficiently high, which means that the pirated content is quite similar to the genuine content and, therefore, attractive to consumers. This is when the *AC effect* dominates the *PE effect*, but only as long as the commission rate is not too high. Similarly, for  $\phi < \hat{\phi}_{M_2}$  to hold, it can be easily verified that  $c < c_A^M = \frac{\beta^2(1-\phi)}{16}$ .

### EC.3.3. Proof of Proposition 3

From Table 4, observe that for  $c \leq c_A$ , the consumer surplus,  $CS_A^* = \frac{4(1+3\beta)-3\beta^2\phi}{32}$ . Differentiating  $CS_A^*$  with respect to  $\phi$ , we note that  $\frac{\partial CS_A^*}{\partial \phi} = -\frac{3\beta^2}{32} < 0$  when  $0 < \beta < 1$ . However, when  $c > c_A$ , the consumer surplus,  $CS_A^* = \frac{(1-\beta)(1-\phi)(16c(1+3\beta)-(1-\phi)\phi\beta^2(5+3\beta))}{8(8c-\beta^2(1-\phi)\phi)^2}$ , therefore  $\frac{\partial CS_A^*}{\partial \phi} = -\frac{(1-\beta)((3\beta+5)\beta^4(1-\phi)^3\phi+128(3\beta+1)c^2-8\beta^2c(\phi-1)(9\beta(\phi-1)-9\phi+1))}{8(8c-\phi(1-\phi)\beta^2)^3}$ .

Since  $1-\beta > 0$  and  $8c-\phi(1-\phi)\beta^2 > 0$  for any  $0 < \beta < 1$ ,  $0 < \phi \leq \frac{1}{2}$ , and  $c > c_A$ , therefore,  $\frac{\partial CS_A^*}{\partial \phi} > 0$ , when  $128(3\beta+1)c^2-8\beta^2c(\phi-1)(9\beta(\phi-1)-9\phi+1)+(3\beta+5)\beta^4(1-\phi)^3\phi < 0$  and  $c > c_A$ .

Define  $f_{ACS}(c) = 128(3\beta+1)c^2-8\beta^2c(\phi-1)(9\beta(\phi-1)-9\phi+1)+(3\beta+5)\beta^4(1-\phi)^3\phi$ . Note that  $\frac{\partial^2 f_{ACS}(c)}{\partial c^2} = 256(3\beta+1) > 0$  and thus  $f_{ACS}(c)$  is a convex function in  $c > c_A$ . Setting  $f_{ACS}(c) = 0$ , we obtain two roots,  $X - \frac{\beta^2(1-\phi)}{32(1+3\beta)}\sqrt{Y}$  and  $X + \frac{\beta^2(1-\phi)}{32(1+3\beta)}\sqrt{Y}$ , where  $X = \frac{1}{72} - \frac{4+3\beta(4+3\beta(1-\phi)(1-9\phi-9\beta(1-\phi)))}{288(1+3\beta)}$  and  $Y = 1+9\beta^2(1-\phi)(9-17\phi)-18\beta(1-\phi)^2-\phi(58-121\phi)$ . As  $f_{ACS}(c)$  is a convex function,  $f_{ACS}(c) < 0 \Rightarrow \frac{\partial CS_A^*}{\partial \phi} > 0$  when  $X - \frac{\beta^2(1-\phi)}{32(1+3\beta)}\sqrt{Y} < c < X + \frac{\beta^2(1-\phi)}{32(1+3\beta)}\sqrt{Y}$ . However, the smaller root  $X - \frac{\beta^2(1-\phi)}{32(1+3\beta)}\sqrt{Y} < c_A$  for any  $0 < \beta < 1$  and  $0 < \phi < \frac{1}{2}$ , but the larger root:  $X + \frac{\beta^2(1-\phi)}{32(1+3\beta)}\sqrt{Y} = c_A^{CS} > c_A$ , when  $0 < \phi < \frac{3\beta^2+21\beta-5-\sqrt{121-18\beta+147\beta^2-90\beta^3+9\beta^4}}{12\beta^2}$  (see Table EC.3 for the full expression of  $c_A^{CS}$ ).

Given that we require  $c > c_A$ , we observe that the appropriate region for  $\frac{\partial CS_A^*}{\partial \phi} > 0$  is  $c_A < c < X - \frac{\beta^2(1-\phi)}{32(1+3\beta)}\sqrt{Y} = c_A^{CS}$ . Hence, we conclude that  $\frac{\partial CS_A^*}{\partial \phi} > 0$  for  $c \in (c_A, c_A^{CS})$ .

### EC.3.4. Proof of Proposition 4

We prove Proposition 4 in two parts.

**EC.3.4.1. Proof of Proposition 4(a).** To prove Proposition 4(a), we state and prove three lemmas.

**LEMMA EC.1. Comparison of  $c_V$ ,  $c_W$ , and  $c_A$ :** (a)  $c_V > \max\{c_W, c_A\}$  for all  $\beta \in (0, 1)$  and  $\phi \in (0, \frac{1}{2})$ . (b)  $c_W > c_A$ , when  $\phi \in (0, \frac{2-\sqrt{2}}{4}]$  and  $\beta_c < \beta < 1$ . (c)  $c_A > c_W$ , when  $\phi \in (0, \frac{2-\sqrt{2}}{4}]$  and  $0 < \beta < \beta_c$ , or  $\phi \in (\frac{2-\sqrt{2}}{4}, \frac{1}{2})$  and  $0 < \beta < 1$ .

*Proof of Lemma EC.1:* Note: The values of  $c_V$ ,  $c_W$ , and  $c_A$  are defined in Table EC.3, while the value of  $\beta_c$  is defined in Table EC.4. By comparing  $c_V$ ,  $c_W$ , and  $c_A$ , we can verify the ordering provided in Lemma EC.1. We omit the detailed steps for the sake of brevity.  $\square$

**LEMMA EC.2. Comparison of  $c_{AW}^0$ ,  $c_W$ , and  $c_A$ :** (a)  $c_{AW}^0 > c_W > c_A$ , when  $\phi \in (0, \frac{2-\sqrt{2}}{4}]$  and  $\beta_c < \beta < 1$ . (b)  $c_A > c_W > c_{AW}^0$ , when  $\phi \in (0, \frac{2-\sqrt{2}}{4}]$  and  $0 < \beta < \beta_c$ , or  $\phi \in (\frac{2-\sqrt{2}}{4}, \frac{1}{2})$  and  $0 < \beta < 1$ .

*Proof of Lemma EC.2* Note: The values of  $c_{AW}^0$ ,  $c_W$ , and  $c_A$  are defined in Table EC.3, while the value of  $\beta_c$  is defined in Table EC.4. Similar to the proof of Lemma EC.1, we can verify the ordering provided in Lemma EC.2 by comparing  $c_{AW}^0$ ,  $c_W$ , and  $c_A$ , and omit the detailed steps for the sake of brevity.  $\square$

**LEMMA EC.3. Comparison of  $\theta_V^*$ ,  $\theta_W^*$ , and  $\theta_A^*$ :** (i)  $\theta_W^* = \theta_A^* = \theta_V^*$  if  $c \in (0, \min\{c_W, c_A\})$ ; (ii)  $\theta_W^* < \theta_A^* = \theta_V^*$  if  $c \in (c_W, c_A)$ ; (iii)  $\theta_A^* < \theta_W^* = \theta_V^*$  if  $c \in (c_A, c_W)$ ; (iv)  $\theta_A^* < \theta_W^* < \theta_V^*$  if  $c \in (c_W, c_{AW}^0)$  and  $c_A < c_W$ ; and (v)  $\theta_W^* < \theta_A^* < \theta_V^*$  otherwise. Note:  $c_V > c_{AW}^0$ .

*Proof of Lemma EC.3:* From Tables 5 and 4, we get the value of optimal quality  $\theta_j$ ,  $j \in \{V, W, A\}$ . Moreover,  $c_V$ ,  $c_W$ , and  $c_A$  are defined in Table EC.3. We consider the following four cases and prove our results:

- (i) For  $c \in (0, \min\{c_W, c_A\})$ , from Table 4, we get  $\theta_W^* = \theta_A^* = 1$ . Now, from Lemma EC.1,  $c_V > \max\{c_W, c_A\}$ . Hence, for  $c \in (0, \min\{c_W, c_A\})$ ,  $\theta_V^* = 1$ . Thus, in this case,  $\theta_W^* = \theta_A^* = \theta_V^* = 1$ .
- (ii) When  $c \in (c_W, c_A)$ , we get the ordering  $c_W < c_A < c_V$  from Lemma EC.1. From Tables 5 and 4, we obtain  $\theta_A^* = \theta_V^* = 1$  but  $\theta_W^* = \frac{8(1-\beta)}{64c-\beta^2} < 1$ . Hence,  $\theta_W^* < \theta_A^* = \theta_V^*$ .
- (iii) When  $c \in (c_A, c_W)$ , we get the order:  $c_A < c_W < c_V$ . From Tables 5 and 4, we obtain  $\theta_W^* = \theta_V^* = 1$  but  $\theta_A^* = \frac{2(1-\beta)(1-\phi)}{8c-\phi(1-\phi)\beta^2} < 1$ . Hence,  $\theta_A^* < \theta_W^* = \theta_V^*$ .
- (iv) For  $\max\{c_W, c_A\} < c < c_V$ , from Tables 5 and 4, we obtain  $\theta_V^* = 1 > \max\{\theta_W^*, \theta_A^*\}$ , where  $\theta_W^* = \frac{8(1-\beta)}{64c-\beta^2}$  and  $\theta_A^* = \frac{2(1-\beta)(1-\phi)}{8c-\phi(1-\phi)\beta^2}$ . Solving  $\theta_A^* = \theta_W^*$ ,  $\Rightarrow c = \frac{\beta^2(1-\phi)(1-4\phi)}{32(1-2\phi)} = c_{AW}^0$ . From Lemma EC.2, we obtain  $c_{AW}^0 > c_W > c_A$  when  $\beta_c < \beta < 1$  and  $\phi \in (0, \frac{2-\sqrt{2}}{4}]$ . Otherwise,  $c_{AW}^0 < c_W < c_A$ . Thus,  $\theta_W^* > \theta_A^*$  when  $c \in (c_W, c_{AW}^0)$  and  $c_A < c_W$ . These relationships hold for  $\phi \in (0, \frac{2-\sqrt{2}}{4}]$  and  $\beta \in (\beta_c, 1)$ . Otherwise,  $\theta_A^* > \theta_W^*$ . Furthermore, for  $c > c_V$ , from Tables 5 and 4, we obtain  $\theta_V^* = \frac{4(1-\beta)}{16c-\beta^2}$ ,  $\theta_W^* = \frac{8(1-\beta)}{64c-\beta^2}$ , and  $\theta_A^* = \frac{2(1-\beta)(1-\phi)}{8c-\phi(1-\phi)\beta^2}$ . Now,  $\theta_V^* - \theta_W^* = 4(1-\beta) \left( \frac{1}{16c-\beta^2} - \frac{2}{64c-\beta^2} \right) = 4(1-\beta) \left( \frac{32c+\beta^2}{(16c-\beta^2)(64c-\beta^2)} \right) > 0$  and  $\theta_V^* - \theta_A^* = 2(1-\beta) \left( \frac{2}{16c-\beta^2} - \frac{1-\phi}{8c-\beta^2(1-\phi)\phi} \right) = 2(1-\beta) \left( \frac{16c\phi+\beta^2(1-\phi)(1-2\phi)}{(16c-\beta^2)(8c-\beta^2(1-\phi)\phi)} \right) > 0$  for any  $0 < \beta < 1$  and  $0 < \phi < \frac{1}{2}$ . In summary, for  $c > \max\{c_W, c_A\}$ , the following relationships hold  $\theta_V^* > \theta_W^* > \theta_A^*$  when  $c \in (c_W, c_{AW}^0)$  and  $c_A < c_W$ . Otherwise,  $\theta_V^* > \theta_A^* > \theta_W^*$ .

From Lemma EC.2, we have  $c_{AW}^{\theta} > c_W > c_A$ , when  $\beta_c < \beta < 1$  and  $\phi \in \left(0, \frac{2-\sqrt{2}}{4}\right]$ . Furthermore, from Lemma EC.3, we find that  $\theta_W^* > \theta_A^*$  under two different scenarios. First, when  $c \in (c_A, c_W)$ , then  $\theta_W^* = \theta_V^* = 1$  but  $\theta_A^* = \frac{2(1-\beta)(1-\phi)}{8c-\phi(1-\phi)\beta^2} < 1$ . Furthermore, when  $c > \max\{c_W, c_A\}$ , from Lemma EC.3, we find that  $\theta_V^* > \theta_W^* > \theta_A^*$  when  $c \in (c_W, c_{AW}^{\theta})$  and  $c_A < c_W$ . Both relationships hold true when  $\beta_c < \beta < 1$  and  $\phi \in \left(0, \frac{2-\sqrt{2}}{4}\right]$ . Thus, (a)  $\theta_A^* < \theta_W^* = \theta_V^*$  if  $c \in (c_A, c_W)$ , and (b)  $\theta_A^* < \theta_W^* < \theta_V^*$  if  $c \in (c_W, c_{AW}^{\theta})$ .  $\square$

### EC.3.4.2. Proof of Proposition 4(b).

- We consider the following four scenarios:
- (i) For  $c \in (0, \min\{c_W, c_A\})$ , from Table 4, we get  $r_W^* = \frac{\beta}{16}$  and  $r_A^* = \frac{\beta\phi}{4}$ . Thus,  $r_W^* - r_A^* = \frac{\beta}{16} - \frac{\beta\phi}{4} = \frac{\beta(1-4\phi)}{16} > 0$  when  $\phi \in \left(0, \frac{1}{4}\right]$ . Otherwise,  $r_W^* - r_A^* < 0$ . Therefore,  $r_W^* > r_A^*$  when  $\phi \in \left(0, \frac{1}{4}\right]$ .
- (ii) For  $c \in (c_W, c_A)$ , from Tables 4, we get  $r_W^* = \frac{\beta(1-\beta)}{2(64c-\beta^2)}$  and  $r_A^* = \frac{\beta\phi}{4}$ . Given  $r_W^*$  is decreasing in  $c$ , we solve  $r_A^* = r_W^*$  to obtain the threshold  $c = \frac{2(1-\beta)+\phi\beta^2}{64\phi} = c_{AW}^r$ , such that  $r_A^* > r_W^*$  when  $c > c_{AW}^r$ , and  $r_A^* < r_W^*$  when  $c < c_{AW}^r$ . Note that  $c_{AW}^r - c_W = \frac{2(1-\beta)+\phi\beta^2}{64\phi} - \frac{8(1-\beta)+\beta^2}{64} = \frac{(1-\beta)(1-4\phi)}{32\phi} > 0$  for any  $\phi \in \left(0, \frac{1}{4}\right]$ . Furthermore, since  $c_A - c_{AW}^r = \frac{(1-\phi)(2(1-\beta)+\phi\beta^2)}{8} - \frac{2(1-\beta)+\phi\beta^2}{64\phi} = \frac{(8(1-\phi)\phi-1)(2(1-\beta)+\phi\beta^2)}{64\phi}$ ,  $c_A > c_{AW}^r$  when  $\phi \in \left(\frac{2-\sqrt{2}}{4}, \frac{1}{2}\right)$ , and  $c_{AW}^r > c_A$  when  $\phi \in \left(0, \frac{2-\sqrt{2}}{4}\right]$ . Remember from Lemma EC.1 that  $c_W < c_A$  implies either  $\phi \in \left(0, \frac{2-\sqrt{2}}{4}\right]$  and  $0 < \beta < \beta_c$ , or  $\phi \in \left(\frac{2-\sqrt{2}}{4}, \frac{1}{2}\right)$  and  $0 < \beta < 1$ . Combining these relationships, we conclude that  $c_W < c_A < c_{AW}^r$  when  $\phi \in \left(0, \frac{2-\sqrt{2}}{4}\right]$  and  $\beta_c < \beta < 1$ ;  $c_W < c_{AW}^r < c_A$  when  $\phi \in \left(\frac{2-\sqrt{2}}{4}, \frac{1}{4}\right]$ ; and  $c_{AW}^r < c_W < c_A$  when  $\phi \in \left(\frac{1}{4}, \frac{1}{2}\right)$ . Therefore,  $r_W^* > r_A^*$  when  $c_W < c < c_{AW}^r$  and  $\phi \in \left(\frac{2-\sqrt{2}}{4}, \frac{1}{4}\right]$ , or  $c_W < c < c_A$ ,  $\phi \in \left(0, \frac{2-\sqrt{2}}{4}\right]$ , and  $\beta_c < \beta < 1$ .
- (iii) For  $c \in (c_A, c_W)$ , from Table 4, we get  $r_W^* = \frac{\beta}{16}$  and  $r_A^* = \frac{(1-\beta)\beta(1-\phi)\phi}{2(8c-(\phi(1-\phi)\beta^2))}$ . Solving  $r_W^* = r_A^*$ , we obtain the threshold  $c = \frac{(8(1-\beta)+\beta^2)(1-\phi)\phi}{8}$ , such that  $r_W^* > r_A^*$  when  $c > \frac{(8(1-\beta)+\beta^2)(1-\phi)\phi}{8}$ . Remember from Lemma EC.1 that  $c_W > c_A$  implies  $\phi \in \left(0, \frac{2-\sqrt{2}}{4}\right]$  and  $\beta_c < \beta < 1$ . Now,  $c_A - \frac{(8(1-\beta)+\beta^2)(1-\phi)\phi}{8} = \frac{(1-\phi)(2(1-\beta)+\phi\beta^2)}{8} - \frac{(8(1-\beta)+\beta^2)(1-\phi)\phi}{8} = \frac{(1-\beta)(1-\phi)(1-4\phi)}{4} > 0$ , for any  $\phi \in \left(0, \frac{2-\sqrt{2}}{4}\right]$ . Therefore,  $r_W^* > r_A^*$  when  $c \in (c_A, c_W)$ .
- (iv) For  $\max\{c_W, c_A\} < c$ , from Table 4, we get  $r_W^* = \frac{\beta(1-\beta)}{2(64c-\beta^2)}$  and  $r_A^* = \frac{(1-\beta)\beta(1-\phi)\phi}{2(8c-(\phi(1-\phi)\beta^2))}$ . Therefore,  $r_A^* - r_W^* = \frac{4(1-\beta)\beta c(8(1-\phi)\phi-1)}{(64c-\beta^2)(8c-\beta^2(1-\phi)\phi)}$ . Now,  $1-\beta > 0$ ,  $64c-\beta^2 > 0$ , and  $8c-\beta^2(1-\phi)\phi > 0$  for  $c > \max\{c_W, c_A\}$ ,  $0 < \beta < 1$ . Hence,  $r_A^* > r_W^*$  when  $8(1-\phi)\phi-1 > 0$ , that is,  $\phi \in \left(\frac{2-\sqrt{2}}{4}, \frac{1}{2}\right)$ . Otherwise,  $r_A^* < r_W^*$  when  $\phi \in \left(0, \frac{2-\sqrt{2}}{4}\right]$ . Combining the four cases, we arrive at the result shown in Proposition 4(b).

### EC.3.5. Proof of Proposition 5

We compare  $\pi_{MW}^*$  and  $\pi_{MA}^*$  in four different cases to arrive at our result.

**EC.3.5.1. When  $c < \min\{c_W, c_A\}$ :** From Table 4, we obtain the values of  $\pi_{MW}^*$  and  $\pi_{MA}^*$  when  $c < \min\{c_W, c_A\}$ . Let  $g_{\pi MWA}(\beta) = \pi_{MW}^* - \pi_{MA}^* = \frac{16(1-\beta)+\beta^2-64c}{128} - \frac{(1-\phi)(4(1-\beta)+\beta^2\phi)-8c}{16} = \frac{16(2\phi-1)(1-\beta)+\beta^2(1-8(1-\phi)\phi)}{128}$ . Note that,  $\frac{\partial^2 g_{\pi MWA}(\beta)}{\partial \beta^2} = \frac{1-8(1-\phi)\phi}{64} > 0$  when  $1-8(1-\phi)\phi > 0$ , i.e.,  $\phi < \frac{2-\sqrt{2}}{4}$ , from Lemma EC.2. Thus,  $g_{\pi MWA}(\beta)$  is convex in  $\beta$  when  $\phi \in \left(0, \frac{2-\sqrt{2}}{4}\right]$  and concave in  $\beta$  when  $\phi \in \left(\frac{2-\sqrt{2}}{4}, \frac{1}{2}\right)$ .

If  $g_{\pi MWA}(\beta)$  is convex in  $\beta$ , observe that  $\frac{\partial g_{\pi MWA}(\beta)}{\partial \beta} = \frac{-8(2\phi-1)+\beta(1-8(1-\phi)\phi)}{64}$  and the optimal  $\beta_{\pi MWA}^* = -\frac{8(1-2\phi)}{1-8(1-\phi)\phi} < 0$  for  $\phi \in \left(0, \frac{2-\sqrt{2}}{4}\right]$ . Hence, in this region,  $g_{\pi MWA}(\beta)$  is an increasing convex function of  $\beta \in (0, 1)$  and we obtain the maximum of  $g_{\pi MWA}(\beta)$  at  $\beta = 1$ . Next, we determine  $g_{\pi MWA}(\beta = 0) = -\frac{1-2\phi}{8} < 0$  and  $g_{\pi MWA}(\beta = 1) = \frac{1-8(1-\phi)\phi}{128} > 0$  as  $\phi \in \left(0, \frac{2-\sqrt{2}}{4}\right]$ . Thus,  $g_{\pi MWA}(\beta)$  changes sign within  $\beta \in (0, 1)$ . Solving  $g_{\pi MWA}(\beta) = 0$ , we obtain two roots:  $\frac{4(2-4\phi-\sqrt{5-2\phi(13-4\phi(5-2\phi))})}{8(1-\phi)\phi-1}$  and  $\frac{4(2-4\phi+\sqrt{5-2\phi(13-4\phi(5-2\phi))})}{8(1-\phi)\phi-1}$ . As  $g_{\pi MWA}(\beta)$  is an increasing convex function of  $\beta \in (0, 1)$  and it changes its sign only once within this range ( $\beta \in (0, 1)$ ), we note that the smaller root  $4\left(\frac{2-4\phi-\sqrt{5-2\phi(13-4\phi(5-2\phi))}}{8(1-\phi)\phi-1}\right) < 0$ , and the larger root  $0 < 4\left(\frac{2-4\phi+\sqrt{5-2\phi(13-4\phi(5-2\phi))}}{8(1-\phi)\phi-1}\right) = \beta_M < 1$  (see Table EC.4 for the value of  $\beta_M$ ). Furthermore, from Lemma EC.1, we obtain that  $c_W > c_A$  when  $\phi \in \left(0, \frac{2-\sqrt{2}}{4}\right]$  and  $\beta_c < \beta < 1$ . Otherwise,  $c_A > c_W$  when  $\phi \in \left(0, \frac{2-\sqrt{2}}{4}\right]$  and  $0 < \beta < \beta_c$ , or  $\phi \in \left(\frac{2-\sqrt{2}}{4}, \frac{1}{2}\right)$  and  $0 < \beta < 1$ . Now,  $\beta_M > \beta_c$  for any  $\phi > 0$ . Therefore,  $g_{\pi MWA}(\beta) > 0 \Rightarrow \pi_{MW}^* > \pi_{MA}^*$  when  $\phi \in \left(0, \frac{2-\sqrt{2}}{4}\right]$ ,  $\beta_M < \beta < 1$ , and  $0 < c < c_A$ .

If  $g_{\pi MW A}(\beta)$  is concave in  $\beta$ , it is maximized at  $\beta_{\pi MW A}^* = \frac{8(1-2\phi)}{8(1-\phi)\phi-1} > 0$ . However, we find that  $\beta_{\pi MW A}^* = \frac{8(1-2\phi)}{8(1-\phi)\phi-1} > 1$  for  $\frac{2-\sqrt{2}}{4} < \phi < \frac{3(2-\sqrt{2})}{4}$ . Thus, in this range of  $\phi$ ,  $g_{\pi MW A}(\beta)$  is an increasing concave function of  $\beta \in (0, 1)$ , and we obtain the maximum of  $g_{\pi MW A}(\beta)$  at  $\beta = 1$ . But in this case,  $g_{\pi MW A}(\beta = 1) = -\frac{8(1-\phi)\phi-1}{128} < 0$  (as  $\phi > \frac{2-\sqrt{2}}{4}$ ) and  $g_{\pi MW A}(\beta = 0) = -\frac{1-2\phi}{8} < 0$ . Hence,  $g_{\pi MW A}(\beta) < 0 \Rightarrow \pi_{MW}^* < \pi_{MA}^*$  for any  $\frac{2-\sqrt{2}}{4} < \phi < \frac{3(2-\sqrt{2})}{4}$ . Finally, for  $\frac{3(2-\sqrt{2})}{4} < \phi < \frac{1}{2}$ ,  $g_{\pi MW A}(\beta)$  is concave with the optimal  $0 < \beta_{\pi MW A}^* = \frac{8(1-2\phi)}{8(1-\phi)\phi-1} < 1$ . Substituting the value of  $\beta_{\pi MW A}^*$ , we get the maximum value of  $g_{\pi MW A}(\beta = \beta_{\pi MW A}^*) = \frac{(1-2\phi)(5-8(2-\phi)\phi)}{8(1-8(1-\phi)\phi)} < 0$  when  $\phi$  lies between  $\frac{3(2-\sqrt{2})}{4}$  and  $\frac{1}{2}$ . Hence,  $g_{\pi MW A} < 0 \Rightarrow \pi_{MW}^* < \pi_{MA}^*$  for any values of  $\phi \in \left(\frac{3(2-\sqrt{2})}{4}, \frac{1}{2}\right)$ .

Therefore, when  $c < \min\{c_W, c_A\}$ ,  $\pi_{MW}^* > \pi_{MA}^*$  when  $\phi \in \left(0, \frac{2-\sqrt{2}}{4}\right]$ ,  $\beta_M < \beta < 1$ , and  $0 < c < c_A$ .

**EC.3.5.2. When  $c \in (c_W, c_A)$ :** From Table 4, we obtain the values of  $\pi_{MW}^*(c) = \frac{(1-\beta)^2}{128c-2\beta^2}$  and  $\pi_{MA}^*(c) = \frac{(1-\phi)(4(1-\beta)+\beta^2\phi)-8c}{16}$ . Comparing the two profit functions, we note that  $\pi_{MA}^* > \pi_{MW}^*$  for all  $c \in (c_W, c_A)$ , and thus this case is not part of Proposition 5.

**EC.3.5.3. When  $c \in (c_A, c_W)$ :** From Table 4, we obtain the values of  $\pi_{MW}^*(c) = \frac{16(1-\beta)+\beta^2-64c}{128}$  and  $\pi_{MA}^*(c) = \frac{(1-\beta)^2(1-\phi)^2}{4(8c-\beta^2(1-\phi)\phi)}$ . Now, the difference  $\pi_{MW}^*(c) - \pi_{MA}^*(c)$  is a decreasing concave function in  $c \in (c_A, c_W)$ , as  $\frac{\partial^2(\pi_{MW}^*(c) - \pi_{MA}^*(c))}{\partial c^2} = -\frac{32(1-\beta)^2(1-\phi)^2}{(8c-\beta^2(1-\phi)\phi)^3} < 0$  and  $\frac{\partial(\pi_{MW}^*(c) - \pi_{MA}^*(c))}{\partial c} = -\frac{1}{2} + \frac{(1-\beta)^2(1-\phi)^2}{(8c-\beta^2(1-\phi)\phi)^2} < 0$ , for  $0 < \beta < 1$ ,  $0 < \phi < \frac{1}{2}$ , and  $c \in (c_A, c_W)$ . Solving  $\pi_{MW}^*(c) - \pi_{MA}^*(c) = 0$ , we obtain two roots:  $\frac{X_{AW}^M - \sqrt{Y_{AW}^M}}{128}$  and  $\frac{X_{AW}^M + \sqrt{Y_{AW}^M}}{128}$ , where  $X_{AW}^M = 16(1-\beta) + \beta^2(1+8(1-\phi)\phi)$ , and  $Y_{AW}^M = (16(1-\beta)(2\phi-1) + \beta^2(1-8(1-\phi)\phi))(16(3-2\phi)(1-\beta) + \beta^2(1-8(1-\phi)\phi))$ , respectively. As  $\pi_{MW}^*(c) - \pi_{MA}^*(c)$  is a decreasing concave function in  $c$ , the smaller root satisfies  $\frac{X_{AW}^M - \sqrt{Y_{AW}^M}}{128} < c_A$ , while the larger root  $\frac{X_{AW}^M + \sqrt{Y_{AW}^M}}{128} = c_\pi \in (c_A, c_W)$ , when  $\phi \in \left(0, \frac{2-\sqrt{2}}{4}\right]$  and  $\beta_M < \beta < \beta_\pi$  (see Table EC.4 for values of  $\beta_M$  and  $\beta_\pi$ ). It can be verified that  $c_\pi \not< c_A$  for any  $\phi \in \left(0, \frac{1}{2}\right)$  and  $0 < \beta < 1$ , and  $c_A < c_W$ . In addition,  $c_\pi > c_W > c_A$  when  $\phi \in \left(0, \frac{2-\sqrt{2}}{4}\right]$  and  $\beta_\pi < \beta < 1$ . Thus, when  $c \in (c_A, c_W)$ ,  $\pi_{MW}^* > \pi_{MA}^*$  when  $c \in \{c_A, c_\pi\}$ ,  $\phi \in \left(0, \frac{2-\sqrt{2}}{4}\right]$ , and  $\beta_M < \beta < \beta_\pi$ , or  $c \in (c_A, c_W)$ ,  $\phi \in \left(0, \frac{2-\sqrt{2}}{4}\right]$ , and  $\beta_\pi < \beta < 1$ .

**EC.3.5.4. When  $c > \max\{c_W, c_A\}$ :** From Table 4, we obtain the values of  $\pi_{MW}^* = \frac{(1-\beta)^2}{128c-2\beta^2}$  and  $\pi_{MA}^* = \frac{(1-\beta)^2(1-\phi)^2}{4(8c-\beta^2(1-\phi)\phi)}$ . We observe that  $\pi_{MW}^* - \pi_{MA}^* = \frac{(1-\beta)^2}{4} \left( \frac{2}{64c-\beta^2} - \frac{(1-\phi)^2}{4(8c-\beta^2(1-\phi)\phi)} \right) > 0$ , when  $c < \frac{\beta^2(1-\phi)(1-3\phi)}{48-64(2-\phi)\phi} = \bar{c}_\pi$  (see Table EC.3 for the value of  $\bar{c}_\pi$ ). Next, we compare  $\bar{c}_\pi$  with  $c_W$ .

Let  $g_{\pi M\bar{c}W}(\beta) = \bar{c}_\pi - c_W = \frac{1}{64} \left( \frac{\beta^2(1-8(1-\phi)\phi)}{3-4(2-\phi)\phi} - 8(1-\beta) \right)$ . Because  $\frac{\partial^2 g_{\pi M\bar{c}W}(\beta)}{\partial \beta^2} = \frac{1-8(1-\phi)\phi}{32(3-4(2-\phi)\phi)}$ ,  $g_{\pi M\bar{c}W}(\beta)$  is convex (concave) in  $\beta$  if  $\frac{1-8(1-\phi)\phi}{32(3-4(2-\phi)\phi)} > 0$ , i.e.,  $\phi \in \left(0, \frac{2-\sqrt{2}}{4}\right]$  (if  $\frac{1-8(1-\phi)\phi}{32(3-4(2-\phi)\phi)} < 0$ , i.e.,  $\phi \in \left(\frac{2-\sqrt{2}}{4}, \frac{1}{2}\right)$ ). Differentiating  $g_{\pi M\bar{c}W}(\beta)$  with respect to  $\beta$ , we obtain the optimal  $\beta_{\bar{c}W}^* = -\frac{4(3-4(2-\phi)\phi)}{1-8(1-\phi)\phi}$ .

When  $\phi \in \left(0, \frac{2-\sqrt{2}}{4}\right]$ , i.e.,  $g_{\pi M\bar{c}W}(\beta)$  is convex,  $\beta_{\bar{c}W}^* = -\frac{4(3-4(2-\phi)\phi)}{1-8(1-\phi)\phi} < 0$ . Hence,  $g_{\pi M\bar{c}W}(\beta)$  is an increasing convex function of  $\beta \in (0, 1)$  with  $g_{\pi M\bar{c}W}(\beta = 0) = -\frac{1}{8} < 0$  and  $g_{\pi M\bar{c}W}(\beta = 1) = \frac{1-8(1-\phi)\phi}{64(3-4(2-\phi)\phi)} > 0$  as  $\phi \in \left(0, \frac{2-\sqrt{2}}{4}\right]$ . Thus,  $g_{\pi M\bar{c}W}(\beta)$  changes its sign (from negative to positive) within  $\beta \in (0, 1)$ . Solving  $g_{\pi M\bar{c}W}(\beta) = 0$ , we get two roots:  $\frac{4(3-8\phi+4\phi^2)-2\sqrt{2(3-2\phi)(1-2\phi)(7-8\phi(3-2\phi))}}{8\phi(1-\phi)-1}$  and  $\frac{4(3-8\phi+4\phi^2)+2\sqrt{2(3-2\phi)(1-2\phi)(7-8\phi(3-2\phi))}}{8\phi(1-\phi)-1}$ . As  $g_{\pi M\bar{c}W}(\beta)$  is an increasing convex function in  $\beta \in (0, 1)$ , the smaller root  $\frac{4(3-8\phi+4\phi^2)-2\sqrt{2(3-2\phi)(1-2\phi)(7-8\phi(3-2\phi))}}{8\phi(1-\phi)-1} < 0$  and the larger root  $0 < \frac{4(3-8\phi+4\phi^2)+2\sqrt{2(3-2\phi)(1-2\phi)(7-8\phi(3-2\phi))}}{8\phi(1-\phi)-1} = \beta_\pi < 1$  (see Table EC.4 for the value of  $\beta_\pi$ ). Thus,  $g_{\pi M\bar{c}W}(\beta) > 0 \Rightarrow \bar{c}_\pi > c_W$ , when  $\beta > \beta_\pi$  and  $\phi \in \left(0, \frac{2-\sqrt{2}}{4}\right]$ . Otherwise,  $c_W > \bar{c}_\pi$ , when  $\beta < \beta_\pi$  and  $\phi \in \left(0, \frac{2-\sqrt{2}}{4}\right]$ .

Furthermore, when  $\phi \in \left(\frac{2-\sqrt{2}}{4}, \frac{1}{2}\right)$ , i.e.,  $g_{\pi M\bar{c}W}(\beta)$  is a concave function, the optimal  $\beta_{\bar{c}W}^* = \frac{4(3-4(2-\phi)\phi)}{8(1-\phi)\phi-1} > 1$ , when  $\frac{2-\sqrt{2}}{4} < \phi < \frac{10-\sqrt{22}}{12}$  and thus,  $g_{\pi M\bar{c}W}(\beta)$  is an increasing concave function in  $\beta \in (0, 1)$ . We determine  $g_{\pi M\bar{c}W}(\beta = 0) = -\frac{1}{8} < 0$  and  $g_{\pi M\bar{c}W}(\beta = 1) = -\frac{8(1-\phi)\phi-1}{64(3-4(2-\phi)\phi)} < 0$  when  $\frac{2-\sqrt{2}}{4} < \phi < \frac{10-\sqrt{22}}{12}$ . Thus, in this region,  $g_{\pi M\bar{c}W}(\beta) < 0 \Rightarrow \bar{c}_\pi < c_W$ . Finally, when  $\frac{10-\sqrt{22}}{12} < \phi < \frac{1}{2}$ ,  $g_{\pi M\bar{c}W}(\beta)$  is concave with  $0 < \beta_{\bar{c}W}^* = \frac{4(3-4(2-\phi)\phi)}{8(1-\phi)\phi-1} < 1$ . Again,  $g_{\pi M\bar{c}W}(\beta = \beta_{\bar{c}W}^*) = -\frac{7-8(3-2\phi)\phi}{8(8(1-\phi)\phi-1)} < 0$ , for  $\frac{10-\sqrt{22}}{12} < \phi < \frac{1}{2}$ . Thus, in this region,  $g_{\pi M\bar{c}W}(\beta) < 0 \Rightarrow \bar{c}_\pi < c_W$ . In summary,  $\bar{c}_\pi > c_W$ , when  $\beta_\pi < \beta < 1$  and  $\phi \in \left(0, \frac{2-\sqrt{2}}{4}\right]$ . Otherwise,  $c_W > \bar{c}_\pi$ , when  $0 < \beta < \beta_\pi$  and  $\phi \in \left(0, \frac{2-\sqrt{2}}{4}\right]$ , or  $\phi \in \left(\frac{2-\sqrt{2}}{4}, \frac{1}{2}\right)$  and  $0 < \beta < 1$ .

From Lemma EC.1, we get  $c_W > c_A$ , when  $\phi \in \left(0, \frac{2-\sqrt{2}}{4}\right]$  and  $\beta_c < \beta < 1$ . Now,  $\beta_\pi > \beta_c$  for any  $0 < \phi < \frac{1}{2}$ . Hence,  $\bar{c}_\pi > c_W > c_A$ , when  $\phi \in \left(0, \frac{2-\sqrt{2}}{4}\right]$  and  $\beta_\pi < \beta < 1$ . For any other parametric ranges of  $\beta$  and  $\phi$ ,  $\bar{c}_\pi < \max\{c_A, c_W\}$ .

Hence, we can conclude that when  $c > \max\{c_W, c_A\}$ ,  $\pi_{MW}^* > \pi_{MA}^*$  if  $c_W < c < \bar{c}_\pi$ ,  $\beta_\pi < \beta < 1$ , and  $\phi \in \left(0, \frac{2-\sqrt{2}}{4}\right]$ .

**EC.3.5.5. Summary considering all  $c$ :** Considering all of the aforementioned parameter spaces together, we summarize that  $\pi_{MW}^* > \pi_{MA}^*$  iff  $\phi \in \left(0, \frac{2-\sqrt{2}}{4}\right]$ , and either (i)  $c \in (0, \underline{c}_\pi)$  and  $\beta \in (\beta_M, \beta_\pi)$ , or (ii)  $c \in (0, \bar{c}_\pi)$  and  $\beta \in (\beta_\pi, 1)$ .

### EC.3.6. Proof of Lemma 1

To compare  $P$ 's profit, we consider four distinct cases, as follows.

- (i) For  $c \in (0, \min\{c_W, c_A\})$ , from Table 4, we obtain values of  $\pi_{PW}^* = \frac{32(1-\beta)+\beta^2}{512}$  and  $\pi_{PA}^* = \frac{\phi(8(1-\beta)+\phi\beta^2)}{32}$ . Now,  $\pi_{PW}^* - \pi_{PA}^* = \frac{(1-4\phi)(32(1-\beta)+\beta^2(1+4\phi))}{512} > 0$  when  $\phi \in \left(0, \frac{1}{4}\right]$  and  $0 < \beta < 1$ .
- (ii) For  $c \in (c_W, c_A)$ , from Table 4, we obtain values of  $\pi_{PW}^* = \frac{(1-\beta)^2(256c-3\beta^2)}{8(64c-\beta^2)^2}$  and  $\pi_{PA}^* = \frac{\phi(8(1-\beta)+\phi\beta^2)}{32}$ . Solving  $\pi_{PW}^* - \pi_{PA}^* = 0$ , we get two roots:  $\frac{\beta^2(6(1-\beta)+\phi\beta^2)}{64(8(1-\beta)+\phi\beta^2)}$  and  $\frac{2(1-\beta)+\phi\beta^2}{64\phi}$ . However, the smaller root  $\frac{\beta^2(6(1-\beta)+\phi\beta^2)}{64(8(1-\beta)+\phi\beta^2)} < c_W$  for any  $0 < \beta < 1$  and  $0 < \phi < \frac{1}{2}$ , while the larger root  $c_W < \frac{2(1-\beta)+\phi\beta^2}{64\phi} = c_{AW}^r < c_A$ , for any  $0 < \beta < 1$  and  $\phi \in \left(\frac{2-\sqrt{2}}{4}, \frac{1}{4}\right]$  (see EC.3 for the value of  $c_{AW}^r$ ). In this region,  $\pi_{PW}^* > \pi_{PA}^*$  when  $c_W < c < c_{AW}^r$ . Furthermore,  $c_A > c_W > c_{AW}^r$  when  $\phi \in \left(\frac{1}{4}, \frac{1}{2}\right)$  and  $0 < \beta < 1$ . Conversely,  $c_{AW}^r > c_A > c_W$  when  $\phi \in \left(0, \frac{2-\sqrt{2}}{4}\right]$  and  $0 < \beta < \beta_c$ . Thus, we conclude that  $\pi_{PW}^* > \pi_{PA}^*$  when  $\phi \in \left(0, \frac{2-\sqrt{2}}{4}\right]$ ,  $c \in (c_W, c_A)$ , and  $\beta \in (0, \beta_c)$ , or  $\phi \in \left(\frac{2-\sqrt{2}}{4}, \frac{1}{4}\right]$ ,  $c \in (c_W, c_{AW}^r)$  and  $c_{AW}^r < c_A$ .
- (iii) For  $c \in (c_A, c_W)$ , from Table 4, we obtain values of  $\pi_{PW}^* = \frac{32(1-\beta)+\beta^2}{512}$  and  $\pi_{PA}^* = \frac{(1-\beta)^2(1-\phi)\phi(32c-3\beta^2(1-\phi)\phi)}{8(8c-\beta^2(1-\phi)\phi^2)}$ . Solving  $\pi_{PW}^* - \pi_{PA}^* = 0$ , we get two roots:  $\frac{\beta^2(24(1-\beta)+\beta^2)(1-\phi)\phi}{8(32(1-\beta)+\beta^2)}$  and  $\frac{(8(1-\beta)+\beta^2)(1-\phi)\phi}{8}$ . Now,  $\pi_{PW}^* > \pi_{PA}^*$  when  $c < \frac{\beta^2(24(1-\beta)+\beta^2)(1-\phi)\phi}{8(32(1-\beta)+\beta^2)}$  or  $c > \frac{(8(1-\beta)+\beta^2)(1-\phi)\phi}{8}$ . The smaller root  $\frac{\beta^2(24(1-\beta)+\beta^2)(1-\phi)\phi}{8(32(1-\beta)+\beta^2)} < c_A$  for any  $0 < \beta < 1$  and  $0 < \phi < \frac{1}{2}$ . However, the larger root  $\frac{(8(1-\beta)+\beta^2)(1-\phi)\phi}{8} < c_A$ , whenever  $c_A < c_W$ . Hence, we conclude that  $\pi_{PW}^* > \pi_{PA}^*$  for all  $c \in (c_A, c_W)$ .
- (iv) Finally, for  $c > \max\{c_W, c_A\}$ , from Table 4, we obtain values of  $\pi_{PW}^*(c) = \frac{(1-\beta)^2(256c-3\beta^2)}{8(64c-\beta^2)^2}$  and  $\pi_{PA}^*(c) = \frac{(1-\beta)^2(1-\phi)\phi(32c-3\beta^2(1-\phi)\phi)}{8(8c-\beta^2(1-\phi)\phi^2)}$ . Solving  $\pi_{PW}^*(c) - \pi_{PA}^*(c) = 0$ , we get two roots of  $c$ :  $X_1 - \sqrt{Y_1}$  and  $X_1 + \sqrt{Y_1}$ , where  $X_1 = \frac{3(1-\beta)^2\beta^2(1-64(1-\phi)^2\phi^2)}{512(1-\beta)^2(1-8(1-\phi)\phi)}$  and  $Y_1 = \frac{(1-\beta)^4\beta^4(1-8(1-\phi)\phi)^2(9-16(1-\phi)\phi(7-36(1-\phi)\phi))}{(512(1-\beta)^2(1-8(1-\phi)\phi))^2}$ . Now, both roots  $X_1 \pm Y_1 < \max\{c_W, c_A\}$ . Hence, the order of the function,  $\pi_{PW}^*(c) - \pi_{PA}^*(c)$ , depends on the sign of the second-order condition. We find that  $\frac{\partial^2(\pi_{MW}^*(c)-\pi_{MA}^*(c))}{\partial c^2} > 0$ , when  $\phi \in \left(0, \frac{2-\sqrt{2}}{4}\right]$ . Similarly, we can find that  $\frac{\partial^2(\pi_{MW}^*(c)-\pi_{MA}^*(c))}{\partial c^2} < 0$ , when  $\phi \in \left(\frac{2-\sqrt{2}}{4}, \frac{1}{2}\right)$ . This implies that  $\pi_{MW}^*(c) - \pi_{MA}^*(c)$  is increasing convex (decreasing concave) in  $c \in (c_A, c_W)$  when  $\phi \in \left(0, \frac{2-\sqrt{2}}{4}\right]$  ( $\phi \in \left(\frac{2-\sqrt{2}}{4}, \frac{1}{2}\right)$ ). Hence, we conclude that  $\pi_{PW}^* > \pi_{PA}^*$  when  $\phi \in \left(0, \frac{2-\sqrt{2}}{4}\right]$ .
- Hence,  $\pi_{PW}^* > \pi_{PA}^*$  iff either (i)  $\phi \in \left(0, \frac{2-\sqrt{2}}{4}\right]$ , or (ii)  $\phi \in \left(\frac{2-\sqrt{2}}{4}, \frac{1}{4}\right]$ , and  $c < c_{AW}^r$ , where  $c_{AW}^r \in (c_W, c_A)$ .

### EC.3.7. Proof of Proposition 6

From Proposition 5, we have  $\pi_{MW}^* > \pi_{MA}^*$  iff  $\phi \in \left(0, \frac{2-\sqrt{2}}{4}\right]$ , and either (i)  $c \in (0, \underline{c}_\pi)$  and  $\beta \in (\beta_M, \beta_\pi)$ , or (ii)  $c \in (0, \bar{c}_\pi)$  and  $\beta \in (\beta_\pi, 1)$ . Furthermore, from Lemma 1, we find that  $\pi_{PW}^* > \pi_{PA}^*$  iff either (i)  $\phi \in \left(0, \frac{2-\sqrt{2}}{4}\right]$ , or (ii)  $\phi \in \left(\frac{2-\sqrt{2}}{4}, \frac{1}{4}\right]$ , and  $c < c_{AW}^r$ , where  $c_{AW}^r \in (c_W, c_A)$ . Combining these relationships, we conclude that both firms  $M$  and  $P$  prefer the wholesale contract over the agency contract, i.e.,  $\pi_{MW}^* > \pi_{MA}^*$  and  $\pi_{PW}^* > \pi_{PA}^*$  iff  $\phi \in \left(0, \frac{2-\sqrt{2}}{4}\right]$ , and either (i)  $c \in (0, \underline{c}_\pi)$  and  $\beta \in (\beta_M, \beta_\pi)$ , or (ii)  $c \in (0, \bar{c}_\pi)$  and  $\beta \in (\beta_\pi, 1)$ .

### EC.3.8. Proof of Corollary 1

We compare the consumer surplus under the two different contracts, but limit our focus to the win-win region given by Proposition 6. We omit the computational details for the sake of brevity.

## EC.4. Analysis of Extensions

We now provide the detailed analysis and results for each of the extensions discussed in Section 5.

### EC.4.1. Analysis of Section 5.1: Equilibrium under $LL$ for Wholesale ( $W$ ) and Agency ( $A$ ) Contracts in Alternate Sequence

In this extension, we consider the decision-making process of  $M$  and  $P$  when their antipiracy actions take place in a sequence different from that shown in Section 3.3. In this alternative sequence, in stage 1,  $P$  determines the protection level  $P$ . In stage 2,  $M$  sets the quality of the digital product,  $\theta$ . Note that our analysis in scenarios  $HH$ ,  $LH$ , and  $HL$ , where at most one firm makes a decision, remains unchanged. The only scenario where both firms make decisions is  $LL$ . The profit functions of the two firms and the decisions of firm  $V$  remain the same as in scenario  $LL$ . Due to the change in the decisions to be made in stages 1 and 2, the backward induction is different in those two stages. We provide closed-form solutions in the equilibrium in Table EC.5. It can be verified that our qualitative insights remain unchanged when the sequence of the antipiracy actions of  $M$  and  $P$  are altered. For brevity, we omit derivations for the last two stages of contract  $W$  and the final stage of contract  $A$ .

**Table EC.5** Equilibrium under  $LL$  for Wholesale ( $W$ ) and Agency ( $A$ ) Contracts in Alternate Sequence

| Variables  | $W$ (Wholesale)                         |                                                             | $A$ (Agency)                                     |                                                                                             |
|------------|-----------------------------------------|-------------------------------------------------------------|--------------------------------------------------|---------------------------------------------------------------------------------------------|
|            | $c \leq c_W$                            | $c > c_W$                                                   | $c \leq c_A$                                     | $c > c_A$                                                                                   |
| $\theta^*$ | 1                                       | $\frac{8(1-\beta)}{64c-\beta^2}$                            | 1                                                | $\frac{2(1-\beta)(1-\phi)}{8c-\beta^2(1-\phi)\phi}$                                         |
| $r^*$      | $\frac{\beta}{16}$                      | $\frac{\beta(1-\beta)}{64c-\beta^2}$                        | $\frac{\beta\phi}{4}$                            | $\frac{\beta(1-\beta)\phi(1-\phi)}{8c-\beta^2(1-\phi)\phi}$                                 |
| $w^*$      | $\frac{16(1-\beta)+\beta^2}{32}$        | $\frac{256c(1-\beta)^2}{(64c-\beta^2)^2}$                   | -                                                | -                                                                                           |
| $p^*$      | $\frac{3(16(1-\beta)+\beta^2)}{64}$     | $\frac{384c(1-\beta)^2}{(64c-\beta^2)^2}$                   | $\frac{4(1-\beta)+\phi\beta^2}{8}$               | $\frac{8(1-\beta)^2c(1-\phi)}{(8c-\beta^2(1-\phi)\phi)^2}$                                  |
| $\pi_M^*$  | $\frac{16(1-\beta)+\beta^2-64c}{128}$   | $\frac{32c(1-\beta)^2}{(64c-\beta^2)^2}$                    | $\frac{(1-\phi)(4(1-\beta)+\phi\beta^2)-8c}{16}$ | $\frac{2c(1-\beta)^2(1-\phi)^2}{(8c-\beta^2(1-\phi)\phi)^2}$                                |
| $\pi_P^*$  | $\frac{32(1-\beta)+\beta^2}{512}$       | $\frac{(1-\beta)^2}{2(64c-\beta^2)}$                        | $\frac{\phi(8(1-\beta)+\phi\beta^2)}{32}$        | $\frac{(1-\beta)^2(1-\phi)\phi}{2(8c-\beta^2(1-\phi)\phi)}$                                 |
| $\pi_T^*$  | $\frac{96(1-\beta)+5\beta^2-256c}{512}$ | $\frac{(1-\beta)^2(128c-\beta^2)}{2(64c-\beta^2)^2}$        | $\frac{8(1-\beta)+\phi(2-\phi)\beta^2-16c}{32}$  | $\frac{(1-\beta)^2(1-\phi)(4c(\phi+1)-\beta^2(1-\phi)\phi^2)}{2(8c-\beta^2(1-\phi)\phi)^2}$ |
| $CS^*$     | $\frac{16(1+15\beta)-15\beta^2}{512}$   | $\frac{4(1-\beta)(4c(1+15\beta)-\beta^2)}{(64c-\beta^2)^2}$ | $\frac{4(1+3\beta)-3\phi\beta^2}{32}$            | $\frac{(1-\beta)(1-\phi)((6\beta+2)c-\beta^2(1-\phi)\phi)}{(8c-\beta^2(1-\phi)\phi)^2}$     |

**EC.4.1.1. Wholesale Contract** From the optimization problem EC.3, we obtain  $M$ 's optimal wholesale price,  $w_W(\theta, r) = \frac{\theta - \beta\theta(1-r)}{2}$  and  $P$ 's selling price,  $p_W(\theta, r) = \frac{3\theta(1-\beta(1-r))}{4}$ . Substituting  $w_W(\theta, r)$  and  $p_W(\theta, r)$  in (EC.1),  $M$ 's profit-maximization problem becomes:

$$\text{Maximize } \pi_{MW}(r, \theta, w_W(\theta, r), p_W(\theta, r)) = \frac{\theta - \beta\theta(1-r)}{8} - \frac{1}{2}c\theta^2, \quad (\text{EC.17})$$

which yields  $M$ 's content quality, wholesale price, and profit in equilibrium, given by  $\theta_W(r) = \frac{1-\beta(1-r)}{8c}$ ,  $w_W(r) = \frac{(1-\beta(1-r))^2}{16c}$ , and  $\pi_{MW}^*(r) = \frac{(1-\beta(1-r))^2}{128c}$ . It may be noted that  $\pi_{MW}(r, \theta, w_W(\theta, r), p_W(\theta, r))$  is concave in  $\theta$  as  $\frac{\partial^2 \pi_{MW}(r, \theta, w_W(\theta, r), p_W(\theta, r))}{\partial \theta^2} = -c < 0$ . Therefore,  $P$ 's selling price is given by  $p_W(r) = \frac{3(1-\beta(1-r))}{32c}$ . Anticipating  $M$ 's reaction, and substituting  $\theta_W(r)$ ,  $w_W(r)$ , and  $p_W(r)$  in (EC.2),  $P$  chooses  $0 < r \leq 1$  to maximize:

$$\pi_{PW}(r, \theta_W(r), w_W(r), p_W(r)) = \frac{(1-\beta(1-r))^2}{128c} - \frac{1}{2}r^2. \quad (\text{EC.18})$$

$\pi_{PW}(r, \theta_W(r), w_W(r), p_W(r))$  is concave in  $r$  as  $\frac{\partial^2 \pi_{PW}(r, \theta_W(r), w_W(r), p_W(r))}{\partial r^2} = -1 + \frac{\beta^2}{64c} < 0$ . Applying FOC to (EC.18) with respect to  $r$  yields  $P$ 's protection level, and consequently, the selling price and profit in equilibrium, given by  $r_W^* = \frac{\beta(1-\beta)}{64c-\beta^2}$ ,  $p_W^* = \frac{384c(1-\beta)^2}{(64c-\beta^2)^2}$ , and  $\pi_{PW}^* = \frac{(1-\beta)^2}{2(64c-\beta^2)}$ , respectively. Substituting  $r_W^*$  and  $p_W^*$  in  $M$ 's response functions, we obtain  $M$ 's wholesale price, content quality, and profit in equilibrium, given by  $w_W^* = \frac{256c(1-\beta)^2}{(64c-\beta^2)^2}$ ,  $\theta_W^* = \frac{8(1-\beta)}{64c-\beta^2}$ , and  $\pi_{MW}^* = \frac{32c(1-\beta)^2}{(64c-\beta^2)^2}$ , respectively. This equilibrium solution exists when  $c > c_W = \frac{8(1-\beta)+\beta^2}{64}$ . The channel profit and the consumer surplus are given by  $\pi_{TW}^* = \frac{(1-\beta)^2(128c-\beta^2)}{2(64c-\beta^2)^2}$  and  $CS_W^* = \frac{4(1-\beta)(4c(1+15\beta)-\beta^2)}{(64c-\beta^2)^2}$ , respectively.

When  $c \leq c_W = \frac{8(1-\beta)+\beta^2}{64}$ , it is easy to show that  $M$ 's wholesale price, content quality, and profit in equilibrium are given by  $w_W^* = \frac{16(1-\beta)+\beta^2}{32}$ ,  $\theta_W^* = 1$ , and  $\pi_{MW}^* = \frac{16(1-\beta)+\beta^2-64c}{128}$ , respectively. Similarly,  $P$ 's selling price, protection level, and firm profit in equilibrium are given by  $p_W^* = \frac{48(1-\beta)+3\beta^2}{64}$ ,  $r_W^* = \frac{\beta}{16}$ , and  $\pi_{PW}^* = \frac{32(1-\beta)+\beta^2}{512}$ , respectively. The channel profit and the consumer surplus are given by  $\pi_{TW}^* = \frac{96(1-\beta)+5\beta^2-256c}{512}$  and  $CS_W^* = \frac{16(1+15\beta)-15\beta^2}{512}$ , respectively. The results are summarized in Table EC.5, under column " $W$  (Wholesale)," with the subscript  $W$  omitted.

**EC.4.1.2. Agency Contract** Applying FOC to (EC.6) with respect to  $p$  yields  $M$ 's selling price and market demand, given by  $p_A(\theta, r) = \frac{\theta - \beta\theta(1-r)}{2}$  and  $\mathcal{D}_A(\theta, r) = \frac{1}{2}$ , respectively. Substituting  $p_A(\theta, r)$  in (EC.6), manufacturer  $M$ 's profit-maximization problem becomes:

$$\text{Maximize } \pi_{MA}(r, \theta, \phi, p_A(\theta, r)) = \frac{\theta(1-\phi)(1-\beta(1-r))}{4} - \frac{1}{2}c\theta^2, \quad (\text{EC.19})$$

which yields  $M$ 's content quality and profit in equilibrium, given by  $\theta_A(r) = \frac{(1-\phi)(1-\beta(1-r))}{4c}$  and  $\pi_{MA}^*(r) = \frac{(1-\phi)^2(1-\beta(1-r))^2}{32c}$ , respectively. It is easy to show that  $\pi_{MA}(r, \theta, \phi, p_A(\theta, r))$  is concave in  $\theta$  as  $\frac{\partial^2 \pi_{MA}(r, \theta, \phi, p_A(\theta, r))}{\partial \theta^2} =$

$-c < 0$ . Substituting  $r_A(\theta)$  in  $\pi_{PA}(r, \theta_A(r), \phi)$ , we obtain  $M$ 's selling price and market demand given by  $p_A(r) = \frac{(1-\phi)(1-\beta(1-r))^2}{8c}$ ,  $q_A(r) = \frac{1}{2}$ . Anticipating  $M$ 's reaction,  $P$  chooses  $0 < r \leq 1$  to maximize:

$$\pi_{PA}(r, \theta_A(r), \phi, p_A(r)) = \frac{\phi(1-\phi)(1-\beta(1-r))^2}{2} - \frac{1}{2}r^2, \quad (\text{EC.20})$$

which is obtained by substituting  $\theta_A(r)$  and  $p_A(r)$  in (EC.6).  $\pi_{PA}(r, \theta_A(r), \phi, p_A(r))$  is concave in  $\theta$  as  $\frac{\partial^2 \pi_{PA}(r, \theta_A(r), \phi, p_A(r))}{\partial r^2} = -1 + \frac{\phi(1-\phi)\beta^2}{8c} < 0$ . Applying FOC to (EC.20) with respect to  $r$  yields  $P$ 's protection level and profit in equilibrium, given by  $r_A^* = \frac{\beta(1-\beta)\phi(1-\phi)}{8c-\beta^2(1-\phi)\phi}$  and  $\pi_{PA}^* = \frac{(1-\beta)^2(1-\phi)\phi}{2(8c-\beta^2(1-\phi)\phi)}$ , respectively. Substituting  $r_A^*$  in  $M$ 's response functions, we obtain  $M$ 's content quality, selling price, and profit in equilibrium, given by  $\theta_A^* = \frac{2(1-\beta)(1-\phi)}{8c-\beta^2(1-\phi)\phi}$ ,  $p_A^* = \frac{8(1-\beta)^2c(1-\phi)}{(8c-\beta^2(1-\phi)\phi)^2}$ , and  $\pi_{MA}^* = \frac{2c(1-\beta)^2(1-\phi)^2}{(8c-\beta^2(1-\phi)\phi)^2}$ , respectively. This equilibrium solution exists when  $c > c_A = \frac{(1-\phi)(2-(2-\beta\phi)\beta)}{8}$ .

The channel profit and consumer surplus are given by  $\pi_{TA}^* = \pi_{MA}^* + \pi_{PA}^* = \frac{(1-\beta)^2(1-\phi)(4c(\phi+1)-\beta^2(1-\phi)\phi^2)}{2(8c-\beta^2(1-\phi)\phi)^2}$  and  $CS_A^* = \frac{(1-\beta)(1-\phi)((6\beta+2)c-\beta^2(1-\phi)\phi)}{(8c-\beta^2(1-\phi)\phi)^2}$ , respectively.

When  $c \leq c_A = \frac{(1-\phi)(2-(2-\beta\phi)\beta)}{8}$ , it is easy to show that  $M$ 's selling price, content quality, and profit in equilibrium are given by  $p_A^* = \frac{4(1-\beta)+\phi\beta^2}{8}$ ,  $\theta_A^* = 1$ , and  $\pi_{MA}^* = \frac{(1-\phi)(4(1-\beta)+\phi\beta^2)-8c}{16}$ , respectively. Similarly,  $P$ 's protection level and firm profit in equilibrium, are given by  $r_A^* = \frac{\beta\phi}{4}$ ,  $\pi_{PA}^* = \frac{\phi(8(1-\beta)+\phi\beta^2)}{32}$ , respectively. The channel profit and the consumer surplus are given by  $\pi_{TA}^* = \frac{8(1-\beta)+\phi(2-\phi)\beta^2-16c}{32}$  and  $CS_A^* = \frac{4(1+3\beta)-3\beta^2\phi}{32}$ , respectively. The results are summarized in Table EC.5, under column "A (Agency)," with the subscript  $A$  omitted.

Comparing the equilibria in Table EC.5, we find that our key results remain unchanged even with the alternate sequence. First, as the commission rate  $\phi$  increases, the quality of genuine content  $\theta_A^*$  and the content manufacturer's profit  $\pi_{MA}^*$  increase when  $c \in (c_A, \frac{\beta^2(1-\phi)^2}{8})$ ,  $0 < \beta < 1$ , and  $0 < \phi \leq \frac{1}{2}$ . Second, both  $M$  and  $P$  prefer the wholesale contract ( $W_{LL}$ ) over the agency contract ( $A_{LL}$ ) iff  $0 < \phi < \frac{2-\sqrt{2}}{4}$ ,  $0 < \beta < 1$ , and  $c \in (\frac{\beta^2}{64}, \frac{\beta^2(1-(5-4\phi)\phi)}{32(1-2\phi)})$ .

## EC.4.2. Analysis of Section 5.2: Equilibrium under $HL$ for Wholesale ( $W$ ) and Agency

### (A) Contracts in Additive Utility Model

Similar to Lahiri and Dey (2013) and Kim et al. (2018), in this section, we consider an additive utility model for pirated content, i.e.,  $\mathcal{U}_P(v, \theta, r) = v\beta\theta - r$ . The utility of consuming genuine content  $\mathcal{U}(v, \theta, p) = v\theta - p$ . Due to analytical complexities, we consider the  $HL$  scenario, i.e., the model in which  $\theta = 1$  and  $r \leq 1$ , while  $c = 0$  and  $k > 0$  (remember that  $HL$  scenario is a special case of  $LL$  scenario). We show that even with  $HL$  scenario, our key results remain intact.

By substituting  $\theta = 1$ , we obtain  $\mathcal{U}(v, 1, p) = v - p$  and  $\mathcal{U}_P(v, 1, r) = v\beta - r$ . Equating  $\mathcal{U}(v, 1, p)$  to  $\mathcal{U}_P(v, 1, r)$  provides us the indifference valuation  $\tilde{v} = \frac{p-r}{1-\beta}$ . Thus, the demand for the genuine product is given by  $\mathcal{D}(1, r, p) = \begin{cases} 1 - \frac{p-r}{1-\beta}, & \text{if } p > \frac{r}{\beta} \\ 1 - p, & \text{if } p \leq \frac{r}{\beta} \end{cases}$ ,

and the demand for the pirated product is  $\mathcal{D}_P(1, r, p) = \begin{cases} \frac{p-r}{1-\beta} - \frac{r}{\beta}, & \text{if } p > \frac{r}{\beta} \\ 0, & \text{if } p \leq \frac{r}{\beta} \end{cases}$ .

**EC.4.2.1. Wholesale Contract With  $\theta = 1$  and  $r < 1$  ( $W_{HL}$ )** Under contract  $W$ , the profit functions for  $M$  and  $P$  become:

$$\pi_{MW}(1, r, w, p) = w\mathcal{D}(1, r, p) = \begin{cases} w\left(1 - \frac{p-r}{1-\beta}\right), & \text{if } p > \frac{r}{\beta} \\ w(1-p), & \text{if } p \leq \frac{r}{\beta} \end{cases}, \text{ and} \quad (\text{EC.21})$$

$$\pi_{PW}(1, r, w, p) = (p-w)\mathcal{D}(1, r, p) - \frac{r^2}{2} = \begin{cases} (p-w)\left(1 - \frac{p-r}{1-\beta}\right) - \frac{r^2}{2}, & \text{if } p > \frac{r}{\beta} \\ (p-w)(1-p) - \frac{r^2}{2}, & \text{if } p \leq \frac{r}{\beta} \end{cases}, \text{ respectively.} \quad (\text{EC.22})$$

In response to  $M$ 's wholesale price offer  $w$  and its own protection level decision  $r$ ,  $P$  chooses  $p_W^{HL}(r, w)$  that maximizes  $\pi_{PW}(1, r, w, p)$  given by (EC.22). When  $p > \frac{r}{\beta}$ , we show that  $\pi_{PW}(1, r, w, p)$  is concave in  $p$  as  $\frac{\partial^2 \pi_{PW}(1, r, w, p)}{\partial p^2} = -\frac{2}{1-\beta} < 0$ , for all  $0 < \beta \leq 1$ . Applying FOC to (EC.22) with respect to  $p$  yields  $P$ 's selling price, demand, and profit function, given by  $p_W^{HL}(w, r) = \frac{1+r+w-\beta}{2}$ ,  $\mathcal{D}_W^{HL}(w, r) = \frac{1+r-w-\beta}{2(1-\beta)}$ , and  $\pi_{PW}^{HL}(w, r) = \frac{(1+r-w-\beta)^2}{4(1-\beta)} - \frac{r^2}{2}$ , respectively. Substituting  $p_W^{HL}(w, r)$  in  $p > \frac{r}{\beta}$ , we obtain  $w > \frac{\beta^2 - \beta - \beta r + 2r}{\beta}$ . On the other hand, when  $p \leq \frac{r}{\beta}$ , we show that  $\pi_{PW}(1, r, w, p)$  is concave in  $p$  as  $\frac{\partial^2 \pi_{PW}(1, r, w, p)}{\partial p^2} = -2 < 0$ . Applying FOC to (EC.22) with respect to  $p$  yields  $P$ 's selling price, demand, and profit function, given by  $p_W^{HL}(w) = \frac{1+w}{2}$ ,  $\mathcal{D}_W^{HL}(w) = \frac{1-w}{2}$ , and  $\pi_{PW}^{HL}(w) = \frac{(1-w)^2}{4} - \frac{r^2}{2}$ , respectively. Substituting  $p_W^{HL}(w, r)$  in  $p \leq \frac{r}{\beta}$ , we obtain  $w \leq \frac{2r-\beta}{\beta}$ . Finally, when  $\frac{2r-\beta}{\beta} < w \leq \frac{\beta^2 - \beta - \beta r + 2r}{\beta}$ , it can be easily shown that  $p_W^{HL}(w, r) = \frac{r}{\beta}$ ,  $\mathcal{D}_W^{HL}(w, r) = 1 - \frac{r}{\beta}$ , and  $\pi_{PW}^{HL}(w, r) = \frac{(\beta-r)(r-\beta w)}{\beta^2} - \frac{r^2}{2}$ , respectively. Therefore, after substituting  $p_W^{HL}(w, r)$  in (EC.21),  $M$ 's profit-

maximization problem becomes:

$$\text{Maximize}_{w>0} \pi_{MW}(1, r, w, p_W^{HL}(r, w)) = \begin{cases} w \left( \frac{1+r-w-\beta}{2(1-\beta)} \right), & \text{if } w > \frac{\beta^2 - \beta - \beta r + 2r}{\beta} \\ w \left( 1 - \frac{r}{\beta} \right), & \text{if } \frac{2r-\beta}{\beta} < w \leq \frac{\beta^2 - \beta - \beta r + 2r}{\beta} \\ w \left( \frac{1-w}{2} \right), & \text{if } w \leq \frac{2r-\beta}{\beta}. \end{cases} \quad (\text{EC.23})$$

For  $w > \frac{\beta^2 - \beta - \beta r + 2r}{\beta}$ ,  $\pi_{MW}(1, r, w, p_W^{HL}(r, w))$  is concave in  $w$  as  $\frac{\partial^2 \pi_{MW}(1, r, w, p_W^{HL}(r, w))}{\partial w^2} = -\frac{1}{1-\beta} < 0$ , for all  $0 < \beta \leq 1$ . The FOC to  $\pi_{MW}(1, r, w, p_W^{HL}(r, w))$  yields  $M$ 's wholesale price and profit function, given by  $w_W^{HL}(r) = \frac{1+r-\beta}{2}$  and  $\pi_{MW}^{HL}(r) = \frac{(1+r-\beta)^2}{8}$ , respectively, in response to  $P$ 's protection level decision  $r$ . Substituting  $w_W^{HL}(r)$  in  $w > \frac{\beta^2 - \beta - \beta r + 2r}{\beta}$ , we obtain  $r < \frac{3\beta(1-\beta)}{4-3\beta}$ . On the other hand, for  $w \leq \frac{2r-\beta}{\beta}$ , we find that  $\pi_{MW}(1, r, w, p_W^{HL}(r, w))$  is concave in  $w$  as  $\frac{\partial^2 \pi_{MW}(1, r, w, p_W^{HL}(r, w))}{\partial w^2} = -1 < 0$ . The FOC to  $\pi_{MW}(1, r, w, p_W^{HL}(r, w))$  yields  $M$ 's wholesale price and profit function, given by  $w_W^{HL}(r) = \frac{1}{2}$  and  $\pi_{MW}^{HL}(r) = \frac{1}{8}$ , respectively. Substituting  $w_W^{HL}(r)$  in  $w \leq \frac{2r-\beta}{\beta}$ , we obtain  $r \geq \frac{3\beta}{4}$ . Finally, for  $\frac{2r-\beta}{\beta} < w \leq \frac{\beta^2 - \beta - \beta r + 2r}{\beta}$ ,  $\pi_{MW}(1, r, w, p_W^{HL}(r, w))$  is increasing in  $w$  as  $\frac{\partial \pi_{MW}(1, r, w, p_W^{HL}(r, w))}{\partial w} = 1 - \frac{r}{\beta} > 0$ , as  $0 < r < \beta < 1$ . It can be easily shown that  $w_W^{HL}(r) = \frac{\beta^2 - \beta - \beta r + 2r}{\beta}$  and  $\pi_{MW}^{HL}(r) = \frac{(\beta-r)((2-\beta)r - \beta + \beta^2)}{\beta^2}$ .

Comparing the manufacturer's profit under the three scenarios provided in (EC.23), we find that there are two thresholds on  $r$ , given by  $\underline{r}_W = \frac{3\beta(1-\beta)}{4-3\beta}$  and  $\bar{r}_W = \frac{\beta}{2(2-\beta)} \left( \sqrt{\frac{\beta}{2}} + (3-2\beta) \right)$ , such that the manufacturer's optimal response to  $r$  is to set  $w_{MW}^{HL}(r) = \frac{1+r-\beta}{2}$  if  $r < \underline{r}_W$ ,  $w_{MW}^{HL}(r) = \frac{\beta^2 - \beta - \beta r + 2r}{\beta}$  if  $\underline{r}_W \leq r < \bar{r}_W$ , and  $w_{MW}^{HL}(r) = \frac{1}{2}$  if  $r \geq \bar{r}_W$ . Consequently,  $\pi_{MW}^{HL}(r) = \frac{(1+r-\beta)^2}{8}$  if  $r < \underline{r}_W$ ,  $\frac{(\beta-r)((2-\beta)r - \beta + \beta^2)}{\beta^2}$  if  $\underline{r}_W \leq r < \bar{r}_W$ , and  $\frac{1}{8}$  if  $r \geq \bar{r}_W$ . Substituting  $w_W^{HL}(r)$  in  $P$ 's response functions, we obtain  $P$ 's selling price and demand functions, given by  $p_W^{HL}(r) = \frac{3(1+r-\beta)}{4}$  if  $r < \underline{r}_W$ ,  $\frac{r}{\beta}$  if  $\underline{r}_W \leq r < \bar{r}_W$ , and  $\frac{3}{4}$  if  $r \geq \bar{r}_W$ , and  $D_W^{HL}(r) = \frac{1+r-\beta}{4(1-\beta)}$  if  $r < \underline{r}_W$ ,  $1 - \frac{r}{\beta}$  if  $\underline{r}_W \leq r < \bar{r}_W$ , and  $\frac{1}{4}$  if  $r \geq \bar{r}_W$ , respectively.

Furthermore, substituting  $w_W^{HL}(r)$  and  $p_W^{HL}(r)$  in (EC.22),  $P$ 's profit-maximization problem becomes:

$$\text{Maximize}_{0 \leq r \leq 1} \pi_{PW}(1, r, w_W^{HL}(r), p_W^{HL}(r)) = \begin{cases} \frac{(1+r-\beta)^2}{16} - \frac{r^2}{2}, & \text{if } r < \underline{r}_W \\ \frac{(1-\beta)(\beta-r)^2}{\beta^2} - \frac{r^2}{2}, & \text{if } \underline{r}_W \leq r < \bar{r}_W \\ \frac{1}{16} - \frac{r^2}{2}, & \text{if } r \geq \bar{r}_W \end{cases} \quad (\text{EC.24})$$

For  $r < \underline{r}_W$ , we find that  $\pi_{PW}(1, r, w_W^{HL}(r), p_W^{HL}(r))$  is concave in  $r$  as  $\frac{\partial^2 \pi_{PW}(1, r, w_W^{HL}(r), p_W^{HL}(r))}{\partial r^2} = -1 + \frac{1}{8(1-\beta)} < 0$ , for  $0 < \beta \leq \frac{7}{8}$ . The FOC to  $\pi_{PW}(1, r, w_W^{HL}(r), p_W^{HL}(r))$  yields  $P$ 's protection level, selling price, quantity, and profit in equilibrium, given by  $r_W^{HL*} = \frac{1-\beta}{7-8\beta}$ ,  $p_W^{HL*} = \frac{6(1-\beta)^2}{7-8\beta}$ ,  $q_W^{HL*} = \frac{2(1-\beta)}{7-8\beta}$ , and  $\pi_{PW}^{HL*} = \frac{(1-\beta)^2}{2(7-8\beta)}$ . Substituting  $r_W^{HL*}$  in  $r < \underline{r}_W$ , we obtain  $\frac{3-\sqrt{3}}{6} < \beta < \frac{3+\sqrt{3}}{6}$ . It can be easily shown that for  $0 < \beta < \frac{3-\sqrt{3}}{6}$  or  $\frac{3+\sqrt{3}}{6} < \beta < 1$ ,  $r_W^{HL*} = \underline{r}_W$ ,  $p_W^{HL*} = 1 - \frac{1}{4-3\beta}$ ,  $q_W^{HL*} = \frac{1}{4-3\beta}$ , and  $\pi_{PW}^{HL*} = \frac{(1-\beta)(2-9(1-\beta)\beta^2)}{2(4-3\beta)^2}$ .

For  $\underline{r}_W \leq r < \bar{r}_W$ , we find that  $\pi_{PW}(1, r, w_W^{HL}(r), p_W^{HL}(r))$  is concave in  $r$  as  $\frac{\partial^2 \pi_{PW}(1, r, w_W^{HL}(r), p_W^{HL}(r))}{\partial r^2} = \frac{2-\beta(2+\beta)}{\beta^2} < 0$ , for  $\sqrt{3}-1 < \beta < 1$ . The FOC to  $\pi_{PW}(1, r, w_W^{HL}(r), p_W^{HL}(r))$  yields an interior solution  $\frac{2\beta(1-\beta)}{2-\beta(2+\beta)}$ . However, for  $\sqrt{3}-1 < \beta < 1$ , we find that  $\frac{2\beta(1-\beta)}{2-\beta(2+\beta)} < \underline{r}_W$ . Hence, for  $\sqrt{3}-1 < \beta < 1$ ,  $\pi_{PW}(1, r, w_W^{HL}(r), p_W^{HL}(r))$  is decreasing in  $r$ . Hence, the equilibrium protection level,  $r_W^{HL*} = \underline{r}_W$ . On the other hand, for  $0 < \beta < \sqrt{3}-1$ , it can be easily shown that equilibrium protection level,  $r_W^{HL*} = \underline{r}_W$ . Hence, in this case, for any  $0 < \beta < 1$ ,  $r_W^{HL*} = \underline{r}_W$ ,  $p_W^{HL*} = 1 - \frac{1}{4-3\beta}$ ,  $q_W^{HL*} = \frac{1}{4-3\beta}$ , and  $\pi_{PW}^{HL*} = \frac{(1-\beta)(2-9(1-\beta)\beta^2)}{2(4-3\beta)^2}$ .

For  $r \geq \bar{r}_W$ , we find that,  $\pi_{PW}(1, r, w_W^{HL}(r), p_W^{HL}(r)) = \frac{1}{16} - \frac{r^2}{2}$ , is decreasing in  $r$ . It can be easily shown that  $P$ 's profit  $\pi_{PW}(1, r, w_W^{HL}(r), p_W^{HL}(r))$  at  $r_W^{HL*} = \bar{r}_W$  is dominated by previous scenarios.

Therefore, for  $\frac{3-\sqrt{3}}{6} < \beta < \frac{3+\sqrt{3}}{6}$ , the equilibrium results are given by  $r_W^{HL*} = \frac{1-\beta}{7-8\beta}$ ,  $w_W^{HL*} = \frac{4(1-\beta)^2}{7-8\beta}$ ,  $p_W^{HL*} = \frac{6(1-\beta)^2}{7-8\beta}$ ,  $\pi_{MW}^{HL*} = \frac{8(1-\beta)^3}{(7-8\beta)^2}$ , and  $\pi_{PW}^{HL*} = \frac{(1-\beta)^2}{2(7-8\beta)}$ . The consumer surplus and the total supply chain profit are given by  $CS_W^{HL*} = \frac{1-4(1-\beta)\beta(1-3\beta)(3-5\beta)+1}{2(7-8\beta)^2\beta}$  and  $\pi_{TW}^{HL*} = \pi_{MW}^{HL*} + \pi_{PW}^{HL*} = \frac{(1-\beta)^2(23-24\beta)}{2(7-8\beta)^2}$ , respectively. For  $0 < \beta < \frac{3-\sqrt{3}}{6}$  or  $\frac{3+\sqrt{3}}{6} < \beta < 1$ , the equilibrium outcomes are given by  $r_W^{HL*} = \frac{3\beta(1-\beta)}{4-3\beta}$ ,  $w_W^{HL*} = \frac{2(1-\beta)}{4-3\beta}$ ,  $p_W^{HL*} = 1 - \frac{1}{4-3\beta}$ ,  $q_W^{HL*} = \frac{1}{4-3\beta}$ ,  $\pi_{MW}^{HL*} = \frac{2(1-\beta)}{(4-3\beta)^2}$  and  $\pi_{PW}^{HL*} = \frac{(1-\beta)(2-9(1-\beta)\beta^2)}{2(4-3\beta)^2}$ . The consumer surplus and the total supply chain profit are given by  $CS_W^{HL*} = \frac{1}{2(4-3\beta)^2}$  and  $\pi_{TW}^{HL*} = \frac{3(1-\beta)(2-3(1-\beta)\beta^2)}{2(4-3\beta)^2}$ , respectively.

**EC.4.2.2. Agency Contract With  $\theta = 1$  and  $r < 1$  ( $A_{HL}$ )** Under contract  $A$ , the profit functions for  $M$  and  $P$  become:

$$\pi_{MA}(1, r, \phi, p) = (1 - \phi)p\mathcal{D}(1, r, p) = \begin{cases} (1 - \phi)p \left(1 - \frac{p-r}{1-\beta}\right), & \text{if } p > \frac{r}{\beta}, \text{ and} \\ (1 - \phi)p(1 - p), & \text{if } p \leq \frac{r}{\beta} \end{cases} \quad (\text{EC.25})$$

$$\pi_{PA}(1, r, \phi, p) = \phi p\mathcal{D}(1, r, p) - \frac{r^2}{2} = \begin{cases} \phi p \left(1 - \frac{p-r}{1-\beta}\right) - \frac{1}{2}r^2, & \text{if } p > \frac{r}{\beta}, \\ \phi p(1 - p) - \frac{r^2}{2}, & \text{if } p \leq \frac{r}{\beta} \end{cases}, \text{ respectively.} \quad (\text{EC.26})$$

In response to  $P$ 's protection level decision  $r$ ,  $M$  chooses  $p_A^{HL}(r)$  that maximizes  $\pi_{MA}(1, r, \phi, p)$  given by (EC.25). When  $p > \frac{r}{\beta}$ , we show that  $\pi_{MA}(1, r, \phi, p)$  is concave in  $p$  as  $\frac{\partial^2 \pi_{MA}(1, r, \phi, p)}{\partial p^2} = -\frac{2(1-\phi)}{1-\beta} < 0$ , for all  $0 < \beta \leq 1$  and  $0 < \phi \leq \frac{1}{2}$ . Applying FOC to (EC.25) with respect to  $p$  yields  $M$ 's selling price, demand, and profit function, given by  $p_A^{HL}(r) = \frac{1+r-\beta}{2}$ ,  $\mathcal{D}_A^{HL}(r) = \frac{1+r-\beta}{2(1-\beta)}$ , and  $\pi_{MA}^{HL}(r) = \frac{(1-\phi)(1+r-\beta)^2}{4(1-\beta)}$ , respectively. Substituting  $p_A^{HL}(r)$  in  $p > \frac{r}{\beta}$ , we obtain  $r < \bar{r}_A = \frac{\beta(1-\beta)}{2-\beta}$ . On the other hand, when  $p \leq \frac{r}{\beta}$ , we show that  $\pi_{MA}(1, r, \phi, p)$  is concave in  $p$  as  $\frac{\partial^2 \pi_{MA}(1, r, \phi, p)}{\partial p^2} = -2(1-\phi) < 0$  for any  $0 < \phi \leq \frac{1}{2}$ . Applying FOC to (EC.25) with respect to  $p$  yields  $M$ 's selling price, demand, and profit function, given by  $p_A^{HL}(r) = \frac{1}{2}$ ,  $\mathcal{D}_A^{HL}(r) = \frac{1}{2}$ , and  $\pi_{MA}^{HL}(r) = \frac{1-\phi}{4}$ , respectively. Substituting  $p_A^{HL}(r)$  in  $p \leq \frac{r}{\beta}$ , we obtain  $r \geq \bar{r}_A = \frac{\beta}{2}$ . Finally, when  $\bar{r}_A < r \leq \bar{r}_A$ , it can be easily shown that  $p_A^{HL}(r) = \frac{r}{\beta}$ ,  $\mathcal{D}_A^{HL}(r) = 1 - \frac{r}{\beta}$ , and  $\pi_{MA}^{HL}(r) = \frac{r(1-\phi)(\beta-r)}{\beta^2}$ , respectively.

Substituting  $p_A^{HL}(r)$  in (EC.26),  $P$ 's profit-maximization problem becomes:

$$\text{Maximize } \pi_{PA}(1, r, \phi, p_A^{HL}(r)) = \begin{cases} \frac{\phi(1+r-\beta)^2}{4(1-\beta)} - \frac{r^2}{2}, & \text{if } r < \bar{r}_A \\ \frac{\phi r(\beta-r)}{\beta^2} - \frac{r^2}{2}, & \text{if } \bar{r}_A < r \leq \bar{r}_A, \\ \frac{\phi}{4} - \frac{r^2}{2}, & \text{if } r \geq \bar{r}_A \end{cases} \quad (\text{EC.27})$$

For  $r < \bar{r}_A$ , we find that  $\pi_{PA}(1, r, \phi, p_A^{HL}(r))$  is concave in  $r$  as  $\frac{\partial^2 \pi_{PA}(1, r, \phi, p_A^{HL}(r))}{\partial r^2} = -1 + \frac{\phi}{2(1-\beta)} < 0$ , for  $0 < \phi \leq \frac{1}{2}$  and  $0 < \beta < \frac{2-\phi}{2}$ . The FOC to  $\pi_{PA}(1, r, \phi, p_A^{HL}(r))$  yields  $P$ 's protection level, selling price, and profit in equilibrium, given by  $r_A^{HL*} = \frac{\phi(1-\beta)}{2(1-\beta)-\phi}$ ,  $p_A^{HL*} = \frac{(1-\beta)^2}{2(1-\beta)-\phi}$ , and  $\pi_{PA}^{HL*} = \frac{\phi(1-\beta)^2}{2(2(1-\beta)-\phi)}$ . Substituting  $r_A^{HL*}$  in  $r < \bar{r}_A$ , we obtain  $0 < \phi < \frac{1}{4}$  and  $\frac{1-\sqrt{1-4\phi}}{2} < \beta < \frac{1+\sqrt{1-4\phi}}{2}$ . It can be easily shown that for  $0 < \phi < \frac{1}{4}$  and  $0 < \beta < \frac{1-\sqrt{1-4\phi}}{2}$ , or  $0 < \phi < \frac{1}{4}$  and  $\frac{1-\sqrt{1-4\phi}}{2} < \beta < 1$ , or  $\frac{1}{4} < \phi < \frac{1}{2}$  and  $0 < \beta < 1$ , the equilibrium outcomes are  $r_A^{HL*} = \bar{r}_A$ ,  $p_A^{HL*} = 1 - \frac{1}{2-\beta}$  and  $\pi_{PA}^{HL*} = \frac{(1-\beta)(2\phi-(1-\beta)\beta^2)}{2(2-\beta)^2}$ .

For  $\bar{r}_A < r \leq \bar{r}_A$ , we find that  $\pi_{PA}(1, r, \phi, p_A^{HL}(r))$  is concave in  $r$  as  $\frac{\partial^2 \pi_{PA}(1, r, \phi, p_A^{HL}(r))}{\partial r^2} = -1 - \frac{2\phi}{\beta^2} < 0$ , for  $\phi > 0$  and  $\beta > 0$ . The FOC to  $\pi_{PA}(1, r, \phi, p_A^{HL}(r))$  yields  $P$ 's protection level, selling price, and profit in equilibrium, given by  $r_A^{HL*} = \frac{\beta\phi}{2\phi+\beta^2}$ ,  $p_A^{HL*} = \frac{\phi}{2\phi+\beta^2}$ , and  $\pi_{PA}^{HL*} = \frac{\phi^2}{4\phi+2\beta^2}$ . Substituting  $r_A^{HL*}$  in  $\bar{r}_A < r \leq \bar{r}_A$ , we obtain conditions:  $0 < \phi < \frac{1}{4}$  and  $0 < \beta < \frac{1-\sqrt{1-4\phi}}{2}$ , or  $0 < \phi < \frac{1}{4}$  and  $\frac{1-\sqrt{1-4\phi}}{2} < \beta < 1$ , or  $\frac{1}{4} < \phi < \frac{1}{2}$  and  $0 < \beta < 1$ . It can be easily shown that for  $0 < \phi < \frac{1}{4}$  and  $\frac{1-\sqrt{1-4\phi}}{2} < \beta < \frac{1+\sqrt{1-4\phi}}{2}$ , the equilibrium outcomes are  $r_A^{HL*} = \bar{r}_A$ ,  $p_A^{HL*} = 1 - \frac{1}{2-\beta}$ ,  $\pi_{PA}^{HL*} = \frac{(1-\beta)(2\phi-(1-\beta)\beta^2)}{2(2-\beta)^2}$ .

For  $r \geq \bar{r}_A$ , we find that,  $\pi_{PA}(1, r, \phi, p_A^{HL}(r)) = \frac{\phi}{4} - \frac{r^2}{2}$ , is decreasing in  $r$ . It can be easily shown that  $P$ 's profit  $\pi_{PA}(1, r, \phi, p_A^{HL}(r))$  at  $r_A^{HL*} = \bar{r}_A$  is dominated by previous scenarios.

Now, when  $0 < \phi < \frac{1}{4}$  and  $\frac{1-\sqrt{1-4\phi}}{2} < \beta < \frac{1+\sqrt{1-4\phi}}{2}$ ,  $P$ 's profit function  $\frac{\phi(1-\beta)^2}{2(2(1-\beta)-\phi)}$  dominates  $\frac{(1-\beta)(2\phi-(1-\beta)\beta^2)}{2(2-\beta)^2}$ , i.e.,  $\frac{\phi(1-\beta)^2}{2(2(1-\beta)-\phi)} > \frac{(1-\beta)(2\phi-(1-\beta)\beta^2)}{2(2-\beta)^2}$ . On the other hand, when  $0 < \phi < \frac{1}{4}$  and  $0 < \beta < \frac{1-\sqrt{1-4\phi}}{2}$ , or  $0 < \phi < \frac{1}{4}$  and  $\frac{1-\sqrt{1-4\phi}}{2} < \beta < 1$ , or  $\frac{1}{4} < \phi < \frac{1}{2}$  and  $0 < \beta < 1$ ,  $P$ 's profit function  $\frac{\phi^2}{4\phi+2\beta^2}$  dominates  $\frac{(1-\beta)(2\phi-(1-\beta)\beta^2)}{2(2-\beta)^2}$ , i.e.,  $\frac{\phi^2}{4\phi+2\beta^2} > \frac{(1-\beta)(2\phi-(1-\beta)\beta^2)}{2(2-\beta)^2}$ .

Therefore, for  $0 < \phi < \frac{1}{4}$  and  $\frac{1-\sqrt{1-4\phi}}{2} < \beta < \frac{1+\sqrt{1-4\phi}}{2}$ , the equilibrium results are given by  $r_A^{HL*} = \frac{\phi(1-\beta)}{2(1-\beta)-\phi}$ ,  $p_A^{HL*} = \frac{(1-\beta)^2}{2(1-\beta)-\phi}$ ,  $\pi_{MA}^{HL*} = \frac{(1-\beta)^3(1-\phi)}{(2(1-\beta)-\phi)^2}$ , and  $\pi_{PA}^{HL*} = \frac{\phi(1-\beta)^2}{2(2(1-\beta)-\phi)}$ . The consumer surplus and the total supply chain profit are given by  $CS_A^{HL*} = \frac{\beta(1+3\beta)(1-\beta)^2-4\phi\beta(1-\beta)+\phi^2}{2\beta(2(1-\beta)-\phi)^2}$  and  $\pi_{TA}^{HL*} = \pi_{MA}^{HL*} + \pi_{PA}^{HL*} = \frac{(1-\beta)^2(2(1-\beta)-\phi^2)}{2(2(1-\beta)-\phi)^2}$ , respectively. Otherwise, for  $0 < \phi < \frac{1}{4}$  and  $0 < \beta < \frac{1-\sqrt{1-4\phi}}{2}$ , or  $0 < \phi < \frac{1}{4}$  and  $\frac{1-\sqrt{1-4\phi}}{2} < \beta < 1$ , or  $\frac{1}{4} < \phi < \frac{1}{2}$  and  $0 < \beta < 1$ , the equilibrium outcomes are given by  $r_A^{HL*} = \frac{\beta\phi}{2\phi+\beta^2}$ ,  $p_A^{HL*} = \frac{\phi}{2\phi+\beta^2}$ , and  $\pi_{PA}^{HL*} = \frac{\phi^2}{4\phi+2\beta^2}$ . The consumer surplus and the total supply chain profit are given by  $CS_A^{HL*} = \frac{1}{2(2-\beta)^2}$  and  $\pi_{TA}^{HL*} = \frac{(1-\beta)(1+\beta)(2-(2-\beta)\beta)}{2(2-\beta)^2}$ , respectively.

Comparing the two contracts, we find that our key results remain unchanged even with the additive utility model. First, as the commission rate  $\phi$  increases,  $M$ 's profit  $\pi_{MA}^{HL*}$  increases when  $0 < \phi < \frac{1}{4}$  and  $\frac{1-\sqrt{1-4\phi}}{2} < \beta < \frac{1+\sqrt{1-4\phi}}{2}$ . Second, both  $M$  and  $P$  prefer the wholesale contract ( $W_{HL}$ ) over the agency contract ( $A_{HL}$ ) iff  $0.74 < \beta < 0.756$  and

$$\frac{17-8\beta(2+(5-\beta)(1-\beta)\beta)}{(7-8\beta)^2} < \phi < \frac{2(1-\beta)^2(1+2\beta^2)}{7-8\beta}, \text{ or } \frac{6-\sqrt{2}}{8} < \beta < 0.756 \text{ and } 0 < \phi < \beta(5-4\beta) - \frac{17+(7-8\beta)\sqrt{17-16\beta(3-4\beta)}}{16},$$

$$\text{or } 0.756 < \beta < \frac{3+\sqrt{3}}{6} \text{ and } 0 < \phi < \frac{2(1-\beta)^2(1+2\beta^2)}{7-8\beta}.$$

### EC.4.3. Analysis of Section 5.3: Equilibrium under $HL$ for Wholesale ( $W$ ) and Agency ( $A$ ) Contracts in Bundling Model

In this case, we consider a scenario in which the  $P$  bundles contents from two manufacturers,  $M_1$  and  $M_2$ . Again, we analyze the  $HL$  scenario ( $\theta = 1$  and  $r \leq 1$ , while  $c = 0$  and  $k > 0$ ) and show that our key results are robust. Thus, the demand for the genuine product, given by (3a), becomes  $\mathcal{D}(1, r, p) = 1 - \frac{p}{1-\beta(1-r)}$ , and following (3b), the demand for the pirated product is  $\mathcal{D}_P(1, r, p) = \frac{p}{1-\beta(1-r)}$  as long as  $r < 1$ , and zero otherwise.

**EC.4.3.1. Wholesale Contract With  $\theta = 1$  and  $r < 1$  ( $W_{HL}$ )** Similar to Kim et al. (2018), under contract  $W$ , the profit functions for manufacturers ( $M_i, i = 1, 2$ ) and  $P$  become:

$$\pi_{M_i W}(1, r, w_i, p) = w_i \mathcal{D}(1, r, p) = w_i \left( 1 - \frac{p}{1-\beta(1-r)} \right) \quad \forall i \in \{1, 2\} \quad \text{and} \quad (\text{EC.28})$$

$$\pi_{PW}(1, r, w_1, w_2, p) = (p - w_1 - w_2) \mathcal{D}(1, r, p) = (p - w_1 - w_2) \left( 1 - \frac{p}{1-\beta(1-r)} \right) - \frac{r^2}{2}, \quad (\text{EC.29})$$

respectively. In response to  $w_1$  and  $w_2$  by  $M_1$  and  $M_2$ , and its own protection level decision  $r$ ,  $P$  chooses  $p_W^{HL}(w_1, w_2, r)$  that maximizes  $\pi_{PW}(1, r, w_1, w_2, p)$  given by (EC.29).  $\pi_{PW}(1, r, w_1, w_2, p)$  is concave in  $p$  as  $\frac{\partial^2 \pi_{PW}(1, r, w_1, w_2, p)}{\partial p^2} = -\frac{2}{1-\beta(1-r)} < 0$ . Applying FOC to (EC.29) with respect to  $p$  yields  $P$ 's selling price, demand, and profit functions, given by  $p_W^{HL}(w_1, w_2, r) = \frac{1+w_1+w_2-\beta(1-r)}{2}$ ,  $\mathcal{D}_W^{HL}(w_1, w_2, r) = \frac{1-\beta(1-r)-w_1-w_2}{2(1-\beta(1-r))}$ , and  $\pi_{PW}^{HL}(w_1, w_2, r) = \frac{(1-w_1-w_2-\beta(1-r))^2}{4(1-\beta(1-r))} - \frac{r^2}{2}$ .

In the previous stage,  $M_1$  and  $M_2$  compete and decide their wholesale prices. Substituting  $p_W^{HL}(w_1, w_2, r)$  in (EC.28), the manufacturers' profit-maximization problems become:

$$\text{Maximize}_{w_i \geq 0} \pi_{M_i W}(1, r, w_i, p_W^{HL}(w_1, w_2, r)) = w_i \mathcal{D}_W^{HL}(w_1, w_2, r) = w_i \left( \frac{1-\beta(1-r)-w_i}{2(1-\beta(1-r))} \right) \quad \forall i \in \{1, 2\}. \quad (\text{EC.30})$$

$\pi_{M_i W}(1, r, w_i, p_W^{HL}(w_1, w_2, r))$  is concave in  $w_i$  as  $\frac{\partial^2 \pi_{M_i W}(1, r, w_i, p_W^{HL}(w_1, w_2, r))}{\partial w_i^2} = -\frac{1}{1-\beta(1-r)} < 0$ , for  $0 < \beta < 1$ ,  $0 < r < 1$ , and  $i \in \{1, 2\}$ . The FOCs from EC.30 yield the manufacturers' wholesale prices and profit functions, given by  $w_i^{HL}(r) = \frac{1-\beta(1-r)}{3}$  and  $\pi_{M_i W}^{HL}(r) = \frac{1-\beta(1-r)}{18}$ , for all  $i \in \{1, 2\}$ , in response to  $P$ 's protection level  $r$ . Substituting  $w_i^{HL}(r)$ ,  $i \in \{1, 2\}$ , in  $P$ 's response functions, we obtain  $P$ 's selling price and demand functions, given by  $p_W^{HL}(r) = \frac{5(1-\beta(1-r))}{6}$  and  $\mathcal{D}_W^{HL}(r) = \frac{1}{6}$ , respectively. Furthermore, substituting  $w_i^{HL}(r)$ ,  $i = 1, 2$ , and  $p_W^{HL}(r)$  in (EC.29),  $P$ 's profit-maximization problem becomes:

$$\text{Maximize}_{0 \leq r \leq 1} \pi_{PW}(1, r, w_1^{HL}(r), w_2^{HL}(r), p_W^{HL}(r)) = \frac{1-\beta(1-r)}{36} - \frac{r^2}{2}. \quad (\text{EC.31})$$

$\pi_{PW}(1, r, w_1^{HL}(r), w_2^{HL}(r), p_W^{HL}(r))$  is concave in  $r$  as  $\frac{\partial^2 \pi_{PW}(1, r, w_1^{HL}(r), w_2^{HL}(r), p_W^{HL}(r))}{\partial r^2} = -1 < 0$ . Applying FOC to EC.31 yields  $P$ 's protection level, and subsequently the selling price and profit in equilibrium, given by  $r_W^{HL*} = \frac{\beta}{36}$ ,  $p_W^{HL*} = \frac{5(36(1-\beta)+\beta^2)}{216}$ , and  $\pi_{PW}^{HL*} = \frac{72(1-\beta)+\beta^2}{2592}$ . Substituting  $r_W^{HL*}$  in  $w_i^{HL}(r_W^{HL*})$  and  $\pi_{M_i W}^{HL}(r_W^{HL*})$ ,  $i = 1, 2$ , we obtain the manufacturers' wholesale prices and profits in equilibrium, given by  $w_i^{HL*} = \frac{36(1-\beta)+\beta^2}{108}$  and  $\pi_{M_i W}^{HL*} = \frac{36(1-\beta)+\beta^2}{648}$  for all  $i \in \{1, 2\}$ . The consumer surplus is given by  $CS_W^{HL*} = \frac{36(1+35\beta)-35\beta^2}{2592}$ . The channel profit is therefore  $\pi_{TW}^{HL*} = \pi_{M_1 W}^{HL*} + \pi_{M_2 W}^{HL*} + \pi_{PW}^{HL*} = \frac{40(1-\beta)+\beta^2}{288}$ .

**EC.4.3.2. Agency Contract With  $\theta = 1$  and  $r < 1$  ( $A_{HL}$ )** Similar to Bhargava (2021), under contract  $A$ , the profit functions for manufacturers ( $M_i, i = 1, 2$ ) and  $P$  become:

$$\pi_{M_i A}(1, r, \phi, p) = \frac{(1-\phi)p\mathcal{D}(1, r, p)}{2} = \frac{(1-\phi)p}{2} \left( 1 - \frac{p}{1-\beta(1-r)} \right) \quad \forall i \in \{1, 2\} \quad \text{and} \quad (\text{EC.32})$$

$$\pi_{PA}(1, r, \phi, p) = \phi p \left( 1 - \frac{p}{1-\beta(1-r)} \right) - \frac{1}{2} r^2, \quad \text{respectively.} \quad (\text{EC.33})$$

It may be noted that, as the manufacturers are symmetric, their profit functions are same. In response to the protection level  $r$ , the retailer  $P$  chooses  $p_A^{HL}(r)$  that maximizes  $\pi_{PA}(1, r, \phi, p)$  given by (EC.33).  $\pi_{PA}(1, r, \phi, p)$  is concave in  $p$  as  $\frac{\partial^2 \pi_{PA}(1, r, \phi, p)}{\partial p^2} = -\frac{2\phi}{1-\beta(1-r)} < 0$ , for  $0 < \beta < 1$  and  $0 < r < 1$ . Applying FOC to (EC.33) with respect to  $p$  yields  $P$ 's selling price, market demand, and profit function, given by  $p_A^{HL}(r) = \frac{1-\beta(1-r)}{2}$ ,  $\mathcal{D}_A^{HL}(r) = \frac{1}{2}$ , and  $\pi_{PA}^{HL}(r) = \frac{\phi(1-\beta(1-r))}{4}$ , respectively. The manufacturers' profits are  $\pi_{M_i A}^{HL}(r) = \frac{(1-\phi)(1-\beta(1-r))}{8}$ ,  $i = 1, 2$ , respectively. Substituting  $p_A^{HL}(r)$  in (EC.33),  $P$ 's profit-maximization problem becomes:

$$\text{Maximize}_{0 \leq r \leq 1} \pi_{PA}(1, r, \phi, p_A^{HL}(r)) = \frac{\phi(1-\beta(1-r))}{4} - \frac{r^2}{2}, \quad (\text{EC.34})$$

which yields  $P$ 's protection level, selling price, and profit in equilibrium, given by  $r_A^{HL*} = \frac{\beta\phi}{4}$ ,  $p_A^{HL*} = \frac{4(1-\beta)+\phi\beta^2}{8}$ , and  $\pi_{PA}^{HL*} = \frac{\phi(8(1-\beta)+\phi\beta^2)}{32}$ , respectively.  $\pi_{PA}(1, r, \phi, p_A^{HL}(r))$  is concave in  $r$  as  $\frac{\partial \pi_{PA}(1, r, \phi, p_A^{HL}(r))}{\partial r} = -1 < 0$ . Substituting  $r_A^{HL*}$  in  $\pi_{A_iW}^{HL}(r_W^{HL*})$ ,  $i \in \{1, 2\}$ , we obtain  $\pi_{M_1A}^{HL*} = \pi_{M_2A}^{HL*} = \frac{(1-\phi)(4(1-\beta)+\phi\beta^2)}{32}$ . The total supply chain profit and consumer surplus are given by  $\pi_{TA}^{HL*} = \frac{8(1-\beta)+\phi(2-\phi)\beta^2}{32}$  and  $CS_A^{HL*} = \frac{4(1+3\beta)-3\beta^2\phi}{32}$ , respectively.

Observe that our key results remain unchanged even with the content bundling. First, as the commission rate  $\phi$  increases, the content manufacturer's profit  $\pi_{M_iA}^{HL*}$  increase when  $2(\sqrt{2}-1) < \beta < 1$  and  $0 < \phi \leq \frac{\beta(4+\beta)-4}{2\beta^2}$ . In addition,  $M_1$ ,  $M_2$ , and  $P$  prefer the wholesale contract ( $W_{HL}$ ) over the agency contract ( $A_{HL}$ ) iff  $\frac{3(7\sqrt{5}-15)}{2} < \beta < 1$  and  $\phi < \frac{(4+\beta)\beta-4}{2\beta^2} - \frac{\sqrt{1296-2592\beta+1368\beta^2-72\beta^3+65\beta^4}}{18\beta^2}$ . In contrast,  $M_1$ ,  $M_2$ , and  $P$  prefer contract  $A_{HL}$  over contract  $W_{HL}$  for all  $\beta$  of  $\frac{1}{9} < \phi < \frac{1}{2}$ .

#### EC.4.4. Analysis of Section 5.4: Equilibrium under $HL$ for Two-Part Tariff ( $TT$ ) Contract

In the two-part tariff contract ( $TT$ ),  $P$  pays the content manufacturer a fixed fee  $F$  and offers a unit price  $w$  for the content (Jiang et al. 2023). We assume that the reservation profit of  $M$  is  $\Pi_M$ . Again, for this extension, we consider the  $HL$  scenario ( $\theta = 1$  and  $r \leq 1$ , while  $c = 0$  and  $k > 0$ ). Similar to our base case analyses, the demand for the genuine product and pirated product are given by  $\mathcal{D}(1, r, p) = 1 - \frac{p}{1-\beta(1-r)}$  and  $\mathcal{D}_P(1, r, p) = \frac{p}{1-\beta(1-r)}$ , respectively.

Under contract  $TT$ , the profit functions for  $M$  and  $P$  become:

$$\pi_{MTT}(r, w, F, p) = w\mathcal{D}(1, r, p) + F = w \left( 1 - \frac{p}{1-\beta(1-r)} \right) + F \quad \text{and} \quad (\text{EC.35})$$

$$\pi_{PTT}(r, w, F, p) = (p-w)\mathcal{D}(1, r, p) - F = (p-w) \left( 1 - \frac{p}{1-\beta(1-r)} \right) - \frac{r^2}{2} - F, \quad (\text{EC.36})$$

respectively. In response to its own unit price offer  $w$  and protection level decision  $r$ ,  $P$  chooses  $p_{TT}^{HL}(r, w)$  that maximizes  $\pi_{PTT}(r, w, F, p)$  given by (EC.36).  $\pi_{PTT}(r, w, F, p)$  is concave in  $p$  as  $\frac{\partial^2 \pi_{PTT}(r, w, F, p)}{\partial p^2} = -\frac{2}{1-\beta(1-r)} < 0$  for  $0 < \beta < 1$  and  $0 < r < 1$ . Applying FOC to (EC.36) with respect to  $p$  yields  $P$ 's selling price, demand, and profit functions, given by  $p_{TT}^{HL}(w, r) = \frac{1+w-\beta(1-r)}{2}$ ,  $\mathcal{D}_{TT}^{HL}(w, r) = \frac{1}{2} - \frac{w}{2(1-\beta(1-r))}$ , and  $\pi_{PTT}^{HL}(w, F, r) = \frac{(1-w-\beta(1-r))^2}{4(1-\beta(1-r))} - \frac{r^2}{2} - F$ , respectively.

Corresponding  $M$ 's profit is given by  $\pi_{MTT}^{HL}(w, F, r) = w \left( \frac{1-\beta(1-r)-w}{2(1-\beta(1-r))} \right) + F$ . In the previous stage,  $P$  solves the following problem:

$$\text{Maximize}_{w \geq 0, F} \pi_{PTT}^{HL}(w, F, r, p_{TT}^{HL}(r, w)) = \frac{(1-w-\beta(1-r))^2}{4(1-\beta(1-r))} - F \quad (\text{EC.37})$$

$$\text{s.t. } \pi_{MTT}^{HL}(w, F, r) = w \left( \frac{1-\beta(1-r)-w}{2(1-\beta(1-r))} \right) + F \geq \Pi_M. \quad (\text{EC.38})$$

It may be noted that  $\pi_{PTT}^{HL}(w, F, r)$  is decreasing in  $F$ . Hence, the constraint (EC.38) binds. Thus,  $F_{TT}^{HL}(w, r) = \Pi_M - w \left( \frac{1-\beta(1-r)-w}{2(1-\beta(1-r))} \right)$  and  $\pi_{MTT}^{HL} = \Pi_M$ . After substituting  $p_{TT}^{HL}(w, r)$  and  $F_{TT}^{HL}(w, r)$  in (EC.36),  $P$ 's profit-maximization problem becomes:

$$\text{Maximize}_{w \geq 0} \pi_{PTT}(r, w, F_{TT}^{HL}(r, w), p_{TT}^{HL}(r, w)) = \frac{1}{4} \left( 1 + \beta(r-1) - \frac{w^2}{1-\beta(1-r)} \right) - \frac{r^2}{2} - \Pi_M, \quad (\text{EC.39})$$

$\pi_{PTT}(1, r, w, F_{TT}^{HL}(r, w), p_{TT}^{HL}(r, w))$  is concave in  $w$  as  $\frac{\partial^2 \pi_{PTT}(1, r, w, F_{TT}^{HL}(r, w), p_{TT}^{HL}(r, w))}{\partial w^2} = -\frac{1}{2(1-\beta(1-r))} < 0$ , for  $0 < \beta < 1$  and  $0 < r < 1$ . Applying FOC on (EC.39) yields  $P$ 's unit price and profit functions, given by  $w_{TT}^{HL}(r) = 0$  and  $\pi_{PTT}^{HL}(r) = \frac{1+\beta(1-r)}{4} - \frac{r^2}{2} - \Pi_M$ , respectively, in response to  $P$ 's protection level decision  $r$ . Substituting  $w_{TT}^{HL}(r)$  in  $P$ 's response functions, we obtain  $P$ 's selling price and demand functions, given by  $p_W^{HL}(r) = \frac{1-\beta(1-r)}{2}$  and  $\mathcal{D}_W^{HL}(r) = \frac{1}{2}$ , respectively. In the first stage,  $P$  solves the following profit-maximization problem:

$$\text{Maximize}_{0 \leq r \leq 1} \pi_{PTT}(r, w_{TT}^{HL}(r), p_{TT}^{HL}(r)) = \frac{1+\beta(1-r)}{4} - \frac{r^2}{2} - \Pi_M, \quad (\text{EC.40})$$

$\pi_{PTT}(r, w_{TT}^{HL}(r), p_{TT}^{HL}(r))$  is concave in  $r$  as  $\frac{\partial^2 \pi_{PTT}(r, w_{TT}^{HL}(r), p_{TT}^{HL}(r))}{\partial r^2} = -1 < 0$ . Applying FOC on (EC.40) yields  $P$ 's protection level, and subsequently the selling price and profit in equilibrium, given by  $r_{TT}^{HL*} = \frac{\beta}{4}$ ,  $p_{TT}^{HL*} = \frac{(2-\beta)^2}{8}$ . Substituting  $r_W^{HL*}$  in  $w_W^{HL}(r_W^{HL*})$  and  $\pi_{MW}^{HL}(r_W^{HL*})$ , we obtain the consumer surplus, given by  $CS_{TT}^{HL*} = \frac{4(1+3\beta)-3\beta^2}{32}$ . The channel profit is therefore  $\pi_{TTT}^{HL*} = \pi_{MTT}^{HL*} + \pi_{PTT}^{HL*} = \frac{8(1-\beta)+\beta^2}{32}$ . Comparing the channel profit with the corresponding vertically integrated profit from Table EC.2, we have  $\pi_{TV}^{HL*} = \pi_{TTT}^{HL*}$ .
